# Supplementary material for: Characterization of the transcriptome of Haloferax volcanii, grown under four different conditions, with mixed RNA-Seq
Source: PLoS One. 2019 Apr 30;14(4):e0215986. doi: 10.1371/journal.pone.0215986 (PMC6490895; doi:10.1371/journal.pone.0215986)
Supplement: S2 Table — The Table lists the predicted RNAs, their genomic locations and their lengths. It also includes the associated HVO_number (gene identifier), presence of overlapping 3’-UTRs, and number of genes on polycistronic transcripts. For cdRNAs, the identification in the previous dRNA-Seq study is flagged [19]. (XLSX) [file pone.0215986.s002.xlsx]

## Sheet: RNASeq Auswertung01
replicon	transcript No.	strand	start	stop	length	RNA class	HVO_	3'-UTR-overlap	Operon	dRNA-Seq	HVO_
CHR	0	+	154	1983	1830	cd	0001				HVO_0001
CHR	1	-	373	452	80	as	0001				HVO_0001
CHR	2	-	1668	2855	1188	cd	0002	+		dRNA-Seq	HVO_0002
CHR	3	+	2995	4560	1566	cd	0003				HVO_0003
CHR	4	+	4696	5883	1188	cd	0004				HVO_0004
CHR	5	-	4727	4776	50	as	0004				HVO_0004
CHR	6	-	4788	4973	186	as	0004				HVO_0004
CHR	7	-	5903	6997	1095	cd	0005			dRNA-Seq	HVO_0005
CHR	8	+	7440	8795	1356	cd	0008				HVO_0008
CHR	9	-	8750	9769	1020	as	0009				HVO_0009
CHR	10	+	8887	10360	1474	cd	0009	+		dRNA-Seq	HVO_0009
CHR	11	-	9792	10892	1101	as	0010				HVO_0010
CHR	12	+	10391	11040	650	as	0010				HVO_0010
CHR	13	-	10978	11515	538	cd	0011			dRNA-Seq	HVO_0011
CHR	14	-	11551	11692	142	ig	0011s				HVO_0011s
CHR	15	+	11667	12532	866	as	0013				HVO_0013
CHR	16	-	11730	14852	3123	cd	0013		2		HVO_0013
CHR	17	+	12744	12913	170	as	0014				HVO_0014
CHR	18	+	14990	15319	330	cd	0015			dRNA-Seq	HVO_0015
CHR	19	+	15396	16849	1454	cd	0016	+			HVO_0016
CHR	20	-	16243	17472	1230	cd	0017	+	2	dRNA-Seq	HVO_0017
CHR	21	+	17051	17366	316	as	0018				HVO_0018
CHR	22	+	17626	18581	956	cd	0019	+		dRNA-Seq	HVO_0019
CHR	23	-	18282	21959	3678	cd	0020	+	3		HVO_0020
CHR	24	+	21374	21605	232	as	0022				HVO_0022
CHR	25	-	23064	23225	162	as	0023				HVO_0023
CHR	26	-	23301	24175	875	cd	0024			dRNA-Seq	HVO_0024
CHR	27	+	24440	25952	1513	cd	0025	+			HVO_0025
CHR	28	-	25256	26741	1486	cd	0026	+			HVO_0026
CHR	29	+	26185	26322	138	as	0026				HVO_0026
CHR	30	+	26896	27945	1050	cd	0027	+		dRNA-Seq	HVO_0027
CHR	31	-	27533	28092	560	cd	0028	+		dRNA-Seq	HVO_0028
CHR	32	+	28068	28089	22	as	0028				HVO_0028
CHR	33	+	28198	32241	4044	cd	0029		2	dRNA-Seq	HVO_0029
CHR	34	-	28961	29074	114	as	0029				HVO_0029
CHR	35	-	32494	34869	2376	cd	0034	+	2	dRNA-Seq	HVO_0034
CHR	36	+	33399	34586	1188	as	0035				HVO_0035
CHR	37	+	34989	35702	714	cd	0036		2	dRNA-Seq	HVO_0036
CHR	38	+	35806	35939	134	as	0038				HVO_0038
CHR	39	-	35814	39429	3616	cd	0038		2		HVO_0038
CHR	40	+	36041	36226	186	as	0038				HVO_0038
CHR	41	+	36628	36751	124	as	0038				HVO_0038
CHR	42	+	37354	37438	85	as	0039				HVO_0039
CHR	43	+	38910	38986	77	as	0039				HVO_0039
CHR	44	-	39455	39662	208	as	0040				HVO_0040
CHR	45	+	39599	40365	767	cd	0040	+			HVO_0040
CHR	46	-	39681	46725	7045	cd	0041	+	7		HVO_0041
CHR	47	+	40583	40673	91	as	0041				HVO_0041
CHR	48	+	40680	40704	25	as	0041				HVO_0041
CHR	49	+	40942	41067	126	as	0041				HVO_0041
CHR	50	-	46768	49871	3104	cd	0048		2		HVO_0048
CHR	51	+	49061	49210	150	as	0049				HVO_0049
CHR	52	-	49919	63172	13254	cd	0051		12		HVO_0051
CHR	53	+	55041	55116	76	as	0056				HVO_0056
CHR	54	+	60166	60416	251	as	0061				HVO_0061
CHR	55	+	60687	60721	35	as	0061				HVO_0061
CHR	56	-	63291	63313	23	ig	0062s				HVO_0062s
CHR	57	-	63335	63414	80	as	0063				HVO_0063
CHR	58	+	63382	67757	4376	cd	0063		3	dRNA-Seq	HVO_0063
CHR	59	-	63666	63928	263	as	0064				HVO_0064
CHR	60	+	69257	69606	350	cd	0067			dRNA-Seq	HVO_0067
CHR	61	-	69430	69538	109	as	0067				HVO_0067
CHR	62	+	70302	70639	338	is	0068				HVO_0068
CHR	63	-	70405	72896	2492	cd	0069	+	3		HVO_0069
CHR	64	+	70688	70944	257	as	0069				HVO_0069
CHR	65	-	73001	73372	372	cd	0072			dRNA-Seq	HVO_0072
CHR	66	+	73877	74706	830	cd	0074	+			HVO_0074
CHR	67	-	74366	74490	125	as	0074				HVO_0074
CHR	68	-	74545	75915	1371	cd	0073	+			HVO_0073
CHR	69	-	76127	76162	36	ig	0073s				HVO_0073s
CHR	70	-	77244	79814	2571	cd	0075		4		HVO_0075
CHR	71	+	80295	80358	64	is	0079				HVO_0079
CHR	72	-	80735	82325	1591	cd	0081	+		dRNA-Seq	HVO_0081
CHR	73	+	80786	81108	323	cd	0080	+			HVO_0080
CHR	74	-	82728	83200	473	cd	0082			dRNA-Seq	HVO_0082
CHR	75	-	83235	83747	513	cd	0083			dRNA-Seq	HVO_0083
CHR	76	-	84516	85172	657	cd	0084			dRNA-Seq	HVO_0084
CHR	77	-	85418	85833	416	cd	0085				HVO_0085
CHR	78	+	85434	85541	108	as	0085				HVO_0085
CHR	79	-	86831	87335	505	is	0086				HVO_0086
CHR	80	-	87468	90331	2864						HVO_
CHR	81	+	88780	89124	345	cd	0088		2		HVO_0088
CHR	82	+	89348	89516	169	as	0090				HVO_0090
CHR	83	+	90462	91183	722	cd	0092	+			HVO_0092
CHR	84	-	90590	91974	1385	cd	0093	+		dRNA-Seq	HVO_0093
CHR	85	+	91306	91584	279	as	0093				HVO_0093
CHR	86	+	91596	91720	125	as	0093				HVO_0093
CHR	87	+	92099	92758	660	cd	0094	+			HVO_0094
CHR	88	-	92103	94017	1915	cd	0095	+	2		HVO_0095
CHR	89	+	93212	93262	51	as	0096				HVO_0096
CHR	90	-	94397	94901	505	is	0097				HVO_0097
CHR	91	+	95083	97535	2453	cd	0098		2	dRNA-Seq	HVO_0098
CHR	92	-	97278	97430	153	as	0099				HVO_0099
CHR	93	+	97752	98752	1001	cd	0099_A	+			HVO_0099_A
CHR	94	-	97980	99896	1917	cd	0100	+	2	dRNA-Seq	HVO_0100
CHR	95	+	98779	99276	498	as	0100				HVO_0100
CHR	96	+	100067	101625	1559	cd	0102		2	dRNA-Seq	HVO_0102
CHR	97	+	101815	102940	1126	cd	0104			dRNA-Seq	HVO_0104
CHR	98	+	103087	104419	1333	cd	0105		2	dRNA-Seq	HVO_0105
CHR	99	-	103713	103811	99	as	0105				HVO_0105
CHR	100	-	104157	104471	315	as	0106				HVO_0106
CHR	101	-	104600	105133	534	cd	0107				HVO_0107
CHR	102	-	105159	107139	1981	cd	0108		2		HVO_0108
CHR	103	+	107295	108396	1102	cd	0110				HVO_0110
CHR	104	-	107354	107480	127	as	0110				HVO_0110
CHR	105	-	107602	108115	514	as	0110				HVO_0110
CHR	106	-	108128	109453	1326	cd	0111	+	2		HVO_0111
CHR	107	+	110166	110520	355	is	0114				HVO_0114
CHR	108	+	110859	114264	3406	cd	0115	+	6	dRNA-Seq	HVO_0115
CHR	109	-	110925	111047	123	as	0115				HVO_0115
CHR	110	-	114023	115655	1633	cd	0121		2		HVO_0121
CHR	111	+	114374	114530	157	as	0121				HVO_0121
CHR	112	+	115904	118110	2207	cd	0123		2		HVO_0123
CHR	113	+	118632	119865	1234	cd	0126	+		dRNA-Seq	HVO_0126
CHR	114	-	119446	119481	36	as	0126				HVO_0126
CHR	115	-	119495	120649	1155	cd	0127	+	2		HVO_0127
CHR	116	+	120823	121456	634	cd	0129		2	dRNA-Seq	HVO_0129
CHR	117	-	121051	121072	22	as	0129				HVO_0129
CHR	118	-	121083	121115	33	as	0129				HVO_0129
CHR	119	-	121490	121511	22	ig	0130s				HVO_0130s
CHR	120	-	121529	121751	223	as	0131				HVO_0131
CHR	121	+	121723	122436	714	cd	0131	+	2	dRNA-Seq	HVO_0131
CHR	122	-	121815	122467	653	cd	0131_B	+			HVO_0131_B
CHR	123	-	122913	124765	1853	cd	0133				HVO_0133
CHR	124	+	123997	124093	97	as	0133				HVO_0133
CHR	125	+	124235	124414	180	as	0133				HVO_0133
CHR	126	+	124437	124574	138	as	0133				HVO_0133
CHR	127	+	124651	124703	53	as	0133				HVO_0133
CHR	128	-	124861	125526	666	cd	0134			dRNA-Seq	HVO_0134
CHR	129	-	125553	126494	942	cd	0135				HVO_0135
CHR	130	-	126509	126884	376	cd	0136			dRNA-Seq	HVO_0136
CHR	131	+	127173	127322	150	as	0137				HVO_0137
CHR	132	-	127211	129224	2014	cd	0137		2		HVO_0137
CHR	133	+	129068	129653	586	cd	0139	+		dRNA-Seq	HVO_0139
CHR	134	-	129419	131581	2163	cd	0140	+		dRNA-Seq	HVO_0140
CHR	135	-	133243	134771	1529	cd	0143		2		HVO_0143
CHR	136	+	135335	136939	1605	cd	0145		2	dRNA-Seq	HVO_0145
CHR	137	+	136984	137231	248	is	0147				HVO_0147
CHR	138	-	137102	137236	135	as	0147				HVO_0147
CHR	139	+	138025	139539	1515						HVO_
CHR	140	+	139571	140158	588	cd	0150				HVO_0150
CHR	141	+	140286	140438	153	is	0151				HVO_0151
CHR	142	+	141383	142293	911	is	0152				HVO_0152
CHR	143	+	142516	143294	779	cd	0154	+		dRNA-Seq	HVO_0154
CHR	144	-	142537	142868	332	as	0154				HVO_0154
CHR	145	-	142893	144011	1119						HVO_
CHR	146	+	144515	144743	229	cd	0157			dRNA-Seq	HVO_0157
CHR	147	+	144790	145835	1046	cd	0158		2	dRNA-Seq	HVO_0158
CHR	148	-	145287	145318	32	as	0158				HVO_0158
CHR	149	-	145326	145363	38	as	0158				HVO_0158
CHR	150	-	146775	147650	876	cd	0161			dRNA-Seq	HVO_0161
CHR	151	+	147769	148979	1211	cd	0162	+			HVO_0162
CHR	152	-	148402	148451	50	as	0162				HVO_0162
CHR	153	-	148461	148545	85	as	0162				HVO_0162
CHR	154	-	148806	149711	906	cd	0163		2		HVO_0163
CHR	155	+	149273	149372	100	as	0163				HVO_0163
CHR	156	+	149914	150801	888	cd	0165			dRNA-Seq	HVO_0165
CHR	157	-	150510	150642	133	as	0165				HVO_0165
CHR	158	-	151189	151560	372	cd	0166			dRNA-Seq	HVO_0166
CHR	159	+	151255	151450	196	as	0166				HVO_0166
CHR	160	+	151664	153524	1861	cd	0167			dRNA-Seq	HVO_0167
CHR	161	-	152923	152968	46	as	0167				HVO_0167
CHR	162	-	153277	153336	60	as	0168				HVO_0168
CHR	163	-	154246	154340	95	as	0169				HVO_0169
CHR	164	+	154470	154763	294	cd	0170			dRNA-Seq	HVO_0170
CHR	165	-	154513	155515	1003	cd	0171	+			HVO_0171
CHR	166	+	155657	155895	239	cd	0172			dRNA-Seq	HVO_0172
CHR	167	-	155976	156884	909	cd	0173			dRNA-Seq	HVO_0173
CHR	168	+	156000	156035	36	as	0173				HVO_0173
CHR	169	+	157209	158134	926	cd	0174	+			HVO_0174
CHR	170	-	157840	158663	824	cd	0175	+			HVO_0175
CHR	171	+	158210	158395	186	as	0175				HVO_0175
CHR	172	+	158909	159857	949	cd	0177				HVO_0177
CHR	173	+	159972	160038	67	as	0176				HVO_0176
CHR	174	+	160495	160640	146	as	0176				HVO_0176
CHR	175	+	162015	162801	787	cd	0179				HVO_0179
CHR	176	+	162849	163813	965	cd	0180			dRNA-Seq	HVO_0180
CHR	177	-	163586	163760	175	as	0180				HVO_0180
CHR	178	-	163856	165605	1750	cd	0182	+	3		HVO_0182
CHR	179	+	163922	164223	302	cd	0181	+			HVO_0181
CHR	180	-	165675	167772	2098	cd	0185			dRNA-Seq	HVO_0185
CHR	181	+	167575	167674	100	as	0185				HVO_0185
CHR	182	+	167922	169345	1424	cd	0186				HVO_0186
CHR	183	-	169123	169297	175	as	0186				HVO_0186
CHR	184	-	169353	169508	156	as	0187				HVO_0187
CHR	185	+	169357	169972	616	cd	0187	+		dRNA-Seq	HVO_0187
CHR	186	-	169593	170379	787	as	0188	+			HVO_0188
CHR	187	+	170420	170965	546	cd	0189			dRNA-Seq	HVO_0189
CHR	188	-	170773	171811	1039	cd	0190			dRNA-Seq	HVO_0190
CHR	189	+	172221	174418	2198	cd	0191		2		HVO_0191
CHR	190	-	173905	174724	820	cd	0192	+		dRNA-Seq	HVO_0192
CHR	191	+	174898	176076	1179	cd	0194			dRNA-Seq	HVO_0194
CHR	192	+	176584	177016	433	is	0195				HVO_0195
CHR	193	-	176696	177099	404	cd	0196	+		dRNA-Seq	HVO_0196
CHR	194	+	177311	177403	93	is	0197				HVO_0197
CHR	195	+	178051	180385	2335	cd	0197_A	+	3		HVO_0197_A
CHR	196	-	178537	178619	83	as	0198				HVO_0198
CHR	197	-	179504	179661	158	as	0199				HVO_0199
CHR	198	-	179821	180505	685	cd	0200	+			HVO_0200
CHR	199	-	180562	181186	625	cd	0201		2		HVO_0201
CHR	200	+	181322	182406	1085	cd	0203	+		dRNA-Seq	HVO_0203
CHR	201	-	182311	185258	2948	cd	0204	+	2	dRNA-Seq	HVO_0204
CHR	202	+	185468	188382	2915	cd	0206				HVO_0206
CHR	203	+	189193	190070	878	cd	0208			dRNA-Seq	HVO_0208
CHR	204	+	190124	194939	4816	cd	0209			dRNA-Seq	HVO_0209
CHR	205	-	190945	191294	350	as	0209				HVO_0209
CHR	206	-	192544	192642	99	as	0212				HVO_0212
CHR	207	-	193089	193248	160	as	0213				HVO_0213
CHR	208	-	193565	193655	91	as	0214				HVO_0214
CHR	209	-	194422	196464	2043	cd	0215			dRNA-Seq	HVO_0215
CHR	210	-	197704	198639	936	cd	0218			dRNA-Seq	HVO_0218
CHR	211	+	198716	203337	4622						HVO_
CHR	212	+	206004	206533	530	cd	0227			dRNA-Seq	HVO_0227
CHR	213	-	206498	210783	4286						HVO_
CHR	214	+	209036	209176	141	as	0231				HVO_0231
CHR	215	-	210851	212120	1270	cd	0234		2		HVO_0234
CHR	216	+	212315	215834	3520	cd	0236		3	dRNA-Seq	HVO_0236
CHR	217	-	215882	217316	1435	cd	0239			dRNA-Seq	HVO_0239
CHR	218	+	217449	218094	646	cd	0240	+			HVO_0240
CHR	219	-	217708	218048	341	cd	0241	+		dRNA-Seq	HVO_0241
CHR	220	-	218131	219402	1272	cd	0242				HVO_0242
CHR	221	+	219596	220881	1286	cd	0243	+		dRNA-Seq	HVO_0243
CHR	222	-	220412	220491	80	as	0243				HVO_0243
CHR	223	-	220562	221713	1152	cd	0244	+		dRNA-Seq	HVO_0244
CHR	224	+	221713	222259	547	cd	0245				HVO_0245
CHR	225	-	221724	221764	41	as	0245				HVO_0245
CHR	226	-	222176	222361	186	ig	0245s				HVO_0245s
CHR	227	-	222416	223378	963	cd	0246			dRNA-Seq	HVO_0246
CHR	228	+	223493	225363	1871	cd	0247	+	3		HVO_0247
CHR	229	-	225155	226637	1483	cd	0250	+			HVO_0250
CHR	230	+	225892	226007	116	as	0250				HVO_0250
CHR	231	+	226818	227638	821	cd	0251		2	dRNA-Seq	HVO_0251
CHR	232	+	227714	228112	399	cd	0253			dRNA-Seq	HVO_0253
CHR	233	+	229189	230738	1550	cd	0255			dRNA-Seq	HVO_0255
CHR	234	-	230934	231316	383	cd	0257			dRNA-Seq	HVO_0257
CHR	235	+	230990	231083	94	is	0256				HVO_0256
CHR	236	-	232372	232396	25	is	0258				HVO_0258
CHR	237	+	233437	235016	1580	cd	0260		3		HVO_0260
CHR	238	-	233817	234081	265	as	0261				HVO_0261
CHR	239	-	235199	236718	1520	cd	0263			dRNA-Seq	HVO_0263
CHR	240	+	236264	237350	1087	cd	0264				HVO_0264
CHR	241	+	237496	238130	635	cd	0265		2	dRNA-Seq	HVO_0265
CHR	242	+	243860	244724	865	cd	0275			dRNA-Seq	HVO_0275
CHR	243	-	243943	244167	225	as	0275				HVO_0275
CHR	244	-	244646	244695	50	as	0275				HVO_0275
CHR	245	-	245073	245219	147	as	0275				HVO_0275
CHR	246	+	245272	245839	568	is	0276				HVO_0276
CHR	247	-	245398	245622	225	as	0276				HVO_0276
CHR	248	+	247317	247835	519	cd	0277				HVO_0277
CHR	249	+	248011	249305	1295	cd	0278				HVO_0278
CHR	250	-	248072	248345	274	as	0278				HVO_0278
CHR	251	-	248704	248841	138	as	0278				HVO_0278
CHR	252	-	249286	249324	39	ig	0278s1				HVO_0278s1
CHR	253	+	249312	249638	327	ig	0278s2				HVO_0278s2
CHR	254	+	249680	249728	49	as	0279				HVO_0279
CHR	255	-	251760	256650	4891	cd	0280		6		HVO_0280
CHR	256	+	252370	252459	90	as	0282				HVO_0282
CHR	257	+	254157	254355	199	as	0283				HVO_0283
CHR	258	+	256767	258048	1282	cd	0285	+		dRNA-Seq	HVO_0285
CHR	259	-	257623	257646	24	as	0285				HVO_0285
CHR	260	-	257867	258765	899	cd	0286				HVO_0286
CHR	261	+	258404	258507	104	as	0286				HVO_0286
CHR	262	-	258894	259366	473	cd	0287		2		HVO_0287
CHR	263	+	259525	260429	905	cd	0289	+			HVO_0289
CHR	264	-	259626	262158	2533	cd	0290	+	3		HVO_0290
CHR	265	+	260458	260631	174	as	0291				HVO_0291
CHR	266	+	262310	264302	1993	cd	0293		3		HVO_0293
CHR	267	-	264212	264280	69	as	0295				HVO_0295
CHR	268	-	264431	265028	598	is	0296				HVO_0296
CHR	269	+	264512	264601	90	as	0296				HVO_0296
CHR	270	+	264610	264633	24	as	0296				HVO_0296
CHR	271	+	264646	264772	127	as	0296				HVO_0296
CHR	272	-	265202	266282	1081	cd	0297		2	dRNA-Seq	HVO_0297
CHR	273	+	266391	267239	849	cd	0299	+		dRNA-Seq	HVO_0299
CHR	274	-	267039	268107	1069	cd	0300	+		dRNA-Seq	HVO_0300
CHR	275	+	268380	270001	1622	is	0301				HVO_0301
CHR	276	-	268886	268979	94	as	0301				HVO_0301
CHR	277	+	270312	271480	1169	cd	0302	+		dRNA-Seq	HVO_0302
CHR	278	-	271304	275433	4130						HVO_
CHR	279	+	275583	275666	84						HVO_
CHR	280	+	275760	277183	1424	cd	0307			dRNA-Seq	HVO_0307
CHR	281	-	275852	275981	130	as	0307				HVO_0307
CHR	282	-	277454	278295	842	cd	0309			dRNA-Seq	HVO_0309
CHR	283	+	278460	286622	8163	cd	0310		8		HVO_0310
CHR	284	-	279721	279814	94	as	0311				HVO_0311
CHR	285	-	281532	281581	50	as	0313				HVO_0313
CHR	286	+	287095	288635	1541	is	0318				HVO_0318
CHR	287	+	288862	290284	1423	cd	0319		2		HVO_0319
CHR	288	-	290032	291326	1295	cd	0321	+		dRNA-Seq	HVO_0321
CHR	289	+	291490	293503	2014	cd	0322	+	2	dRNA-Seq	HVO_0322
CHR	290	-	293065	295182	2118	cd	0324	+		dRNA-Seq	HVO_0324
CHR	291	+	293547	293621	75	as	0324				HVO_0324
CHR	292	+	295386	295693	308	cd	0325			dRNA-Seq	HVO_0325
CHR	293	+	295973	297482	1510	cd	0326			dRNA-Seq	HVO_0326
CHR	294	-	296187	296289	103	as	0326				HVO_0326
CHR	295	+	298445	299800	1356	cd	0329	+			HVO_0329
CHR	296	-	298872	298957	86	as	0329				HVO_0329
CHR	297	-	299298	300997	1700	cd	0330	+	2		HVO_0330
CHR	298	+	299945	300213	269	as	0330				HVO_0330
CHR	299	+	301052	301199	148						HVO_
CHR	300	+	302368	306188	3821	cd	0334		4	dRNA-Seq	HVO_0334
CHR	301	-	304948	305283	336	as	0336				HVO_0336
CHR	302	+	306256	306847	592	cd	0337	+		dRNA-Seq	HVO_0337
CHR	303	-	306336	307526	1191	cd	0338	+		dRNA-Seq	HVO_0338
CHR	304	+	307430	307613	184	as	0338				HVO_0338
CHR	305	+	308186	308819	634	is	0339				HVO_0339
CHR	306	+	310606	310791	186						HVO_
CHR	307	+	311062	311274	213	is	0343				HVO_0343
CHR	308	-	311294	311832	539	tRNA	0344		2		HVO_0344
CHR	309	+	311297	311400	104	ig	0343s				HVO_0343s
CHR	310	+	311961	321067	9107	cd	0346		7	dRNA-Seq	HVO_0346
CHR	311	+	321180	322471	1292	cd	0353			dRNA-Seq	HVO_0353
CHR	312	-	321788	321872	85	as	0354				HVO_0354
CHR	313	-	322554	323277	724	cd	0355				HVO_0355
CHR	314	+	323492	329558	6067	cd	0356				HVO_0356
CHR	315	-	323498	323582	85	as	0356				HVO_0356
CHR	316	-	323666	323746	81	as	0356				HVO_0356
CHR	317	-	325032	325123	92	as	0356				HVO_0356
CHR	318	-	325449	325555	107	as	0356				HVO_0356
CHR	319	-	325954	326082	129	as	0357				HVO_0357
CHR	320	-	329021	329118	98	as	0360				HVO_0360
CHR	321	+	341863	342172	310	ig	0385s				HVO_0385s
CHR	322	-	341920	342495	576	cd	0385_A				HVO_0385_A
CHR	323	+	342367	342497	131	as	0385_A				HVO_0385_A
CHR	324	+	342633	342830	198	ig	0385_As				HVO_0385_As
CHR	325	+	342842	345023	2182	cd	0386	+	2	dRNA-Seq	HVO_0386
CHR	326	-	343422	345028	1607	cd	0388	+		dRNA-Seq	HVO_0388
CHR	327	-	345039	345439	401	cd	0389			dRNA-Seq	HVO_0389
CHR	328	+	345535	346249	715	cd	0390			dRNA-Seq	HVO_0390
CHR	329	-	345852	346181	330	as	0390				HVO_0390
CHR	330	+	347034	350568	3535	cd	0392		2		HVO_0392
CHR	331	+	350597	350981	385	cd	0394				HVO_0394
CHR	332	+	351584	352217	634	as	0395				HVO_0395
CHR	333	+	352365	353421	1057	cd	0396				HVO_0396
CHR	334	-	353196	354935	1740	cd	0397		2	dRNA-Seq	HVO_0397
CHR	335	+	353754	353954	201	as	0397				HVO_0397
CHR	336	+	354108	354177	70	as	0397				HVO_0397
CHR	337	+	354207	354228	22	as	0397				HVO_0397
CHR	338	+	354239	354261	23	as	0397				HVO_0397
CHR	339	+	355060	359262	4203	cd	0399		5	dRNA-Seq	HVO_0399
CHR	340	-	356177	356318	142	as	0400				HVO_0400
CHR	341	-	358624	358767	144	as	0403				HVO_0403
CHR	342	-	360750	360811	62	as	0405				HVO_0405
CHR	343	-	360898	360977	80	as	0405				HVO_0405
CHR	344	+	361094	361620	527	is	0405				HVO_0405
CHR	345	-	361196	361268	73	as	0405				HVO_0405
CHR	346	-	361316	363406	2091	cd	0406	+	2		HVO_0406
CHR	347	+	361771	361847	77	as	0406				HVO_0406
CHR	348	+	363569	364951	1383	cd	0408	+			HVO_0408
CHR	349	-	363695	363721	27	as	0408				HVO_0408
CHR	350	-	364436	365253	818	cd	0409	+		dRNA-Seq	HVO_0409
CHR	351	+	365388	366207	820	cd	0410_A		2		HVO_0410_A
CHR	352	-	367160	367674	515	cd	0412			dRNA-Seq	HVO_0412
CHR	353	+	367851	368128	278	cd	0413				HVO_0413
CHR	354	-	367916	367948	33	as	0413				HVO_0413
CHR	355	-	367961	374710	6750						HVO_
CHR	356	+	373172	373242	71	as	0418				HVO_0418
CHR	357	+	374065	374302	238	as	0418				HVO_0418
CHR	358	-	374787	374892	106	is	0419				HVO_0419
CHR	359	+	376829	377434	606	is	0420				HVO_0420
CHR	360	+	377848	379913	2066	cd	0421	+		dRNA-Seq	HVO_0421
CHR	361	-	379185	379416	232	as	0421				HVO_0421
CHR	362	-	379550	380116	567	cd	0422	+			HVO_0422
CHR	363	+	380254	382472	2219	cd	0423		2	dRNA-Seq	HVO_0423
CHR	364	-	383913	386117	2205	cd	0427		3		HVO_0427
CHR	365	+	385943	388578	2636	cd	0430		4		HVO_0430
CHR	366	-	388473	389704	1232	cd	0434				HVO_0434
CHR	367	-	390032	391253	1222	cd	0435		3		HVO_0435
CHR	368	+	391498	392194	697	cd	0438	+	2	dRNA-Seq	HVO_0438
CHR	369	-	391935	393121	1187	cd	0440	+	2		HVO_0440
CHR	370	+	392581	393143	563	as	0441				HVO_0441
CHR	371	+	393186	393824	639	cd	0442		2		HVO_0442
CHR	372	+	393983	395211	1229	cd	0444	+		dRNA-Seq	HVO_0444
CHR	373	-	394321	394463	143	as	0444				HVO_0444
CHR	374	-	394613	397617	3005	cd	0445		3		HVO_0445
CHR	375	+	395223	395372	150	as	0445				HVO_0445
CHR	376	+	395384	395446	63	as	0445				HVO_0445
CHR	377	+	395458	395624	167	as	0445				HVO_0445
CHR	378	+	396150	396189	40	as	0446				HVO_0446
CHR	379	+	397897	400647	2751	cd	0448		4	dRNA-Seq	HVO_0448
CHR	380	+	400744	403609	2866	cd	0452			dRNA-Seq	HVO_0452
CHR	381	-	402286	402407	122	as	0452				HVO_0452
CHR	382	+	403617	403655	39	is	0452				HVO_0452
CHR	383	+	403734	404610	877	cd	0453	+		dRNA-Seq	HVO_0453
CHR	384	-	403775	404994	1220	cd	0454	+		dRNA-Seq	HVO_0454
CHR	385	+	404656	405017	362	as	0454				HVO_0454
CHR	386	-	405111	407908	2798	cd	0455			dRNA-Seq	HVO_0455
CHR	387	+	406677	406698	22	as	0455				HVO_0455
CHR	388	+	406865	406962	98	as	0455				HVO_0455
CHR	389	+	408029	408167	139	is	0457s				HVO_0457s
CHR	390	-	408217	408581	365	tRNA	0458				HVO_0458
CHR	391	-	408652	409035	384	cd	0459			dRNA-Seq	HVO_0459
CHR	392	-	409085	410353	1269	cd	0460		2		HVO_0460
CHR	393	-	410482	411848	1367	cd	0462			dRNA-Seq	HVO_0462
CHR	394	+	410950	411082	133	as	0462				HVO_0462
CHR	395	-	411973	412038	66	ig	0462s				HVO_0462s
CHR	396	-	412075	413747	1673	cd	0464	+		dRNA-Seq	HVO_0464
CHR	397	+	412149	412689	541	cd	0463_A	+			HVO_0463_A
CHR	398	+	413980	414062	83	is	0465				HVO_0465
CHR	399	-	415367	416591	1225	cd	0466			dRNA-Seq	HVO_0466
CHR	400	+	416849	418163	1315	cd	0467			dRNA-Seq	HVO_0467
CHR	401	-	418069	418429	361	cd	0468				HVO_0468
CHR	402	+	418564	420772	2209	cd	0469		2	dRNA-Seq	HVO_0469
CHR	403	-	422193	422470	278	cd	0472			dRNA-Seq	HVO_0472
CHR	404	-	422596	425390	2795	cd	0474	+	3	dRNA-Seq	HVO_0474
CHR	405	+	422635	422988	354	cd	0473	+		dRNA-Seq	HVO_0473
CHR	406	+	423576	423656	81	as	0474				HVO_0474
CHR	407	-	425584	426527	944	cd	0477			dRNA-Seq	HVO_0477
CHR	408	+	426589	427727	1139	cd	0478	+		dRNA-Seq	HVO_0478
CHR	409	-	427434	428195	762	cd	0479	+		dRNA-Seq	HVO_0479
CHR	410	-	428321	430986	2666	cd	0480	+	2	dRNA-Seq	HVO_0480
CHR	411	+	428328	428543	216	as	0480				HVO_0480
CHR	412	+	428797	429301	505	as	0480				HVO_0480
CHR	413	-	431041	431517	477	as	0482				HVO_0482
CHR	414	+	431254	431848	595	cd	0482	+		dRNA-Seq	HVO_0482
CHR	415	-	431528	433121	1594	cd	0483	+	2		HVO_0483
CHR	416	+	431954	432082	129	as	0483				HVO_0483
CHR	417	+	432296	432537	242	as	0483				HVO_0483
CHR	418	+	432693	432819	127	as	0484				HVO_0484
CHR	419	+	433323	434039	717	cd	0485	+		dRNA-Seq	HVO_0485
CHR	420	-	433812	434720	909	cd	0486	+			HVO_0486
CHR	421	-	434815	435338	524	as	0487				HVO_0487
CHR	422	+	434863	435822	960	cd	0487		2	dRNA-Seq	HVO_0487
CHR	423	+	435848	436940	1093	cd	0489		3		HVO_0489
CHR	424	+	436966	439185	2220	cd	0492		3		HVO_0492
CHR	425	-	437861	437977	117	as	0493				HVO_0493
CHR	426	-	438448	438578	131	as	0494				HVO_0494
CHR	427	-	438856	439305	450	cd	0494				HVO_0494
CHR	428	-	439346	440802	1457	cd	0496		3		HVO_0496
CHR	429	-	441155	441304	150	tRNA	0499				HVO_0499
CHR	430	-	441429	442154	726	cd	0500				HVO_0500
CHR	431	+	441477	441603	127	as	0500				HVO_0500
CHR	432	-	442805	443084	280	tRNA	0503				HVO_0503
CHR	433	+	442863	442883	21	tRNA	0503				HVO_0503
CHR	434	+	442921	442965	45	tRNA	0503				HVO_0503
CHR	435	+	443320	443859	540	cd	0504			dRNA-Seq	HVO_0504
CHR	436	+	443996	444027	32						HVO_
CHR	437	+	444110	446077	1968	cd	0506				HVO_0506
CHR	438	-	445752	445785	34	as	0506				HVO_0506
CHR	439	-	445794	445820	27	as	0506				HVO_0506
CHR	440	-	446059	446108	50	as	0507				HVO_0507
CHR	441	-	446280	447277	998	cd	0508	+		dRNA-Seq	HVO_0508
CHR	442	+	446334	446657	324	is	0507				HVO_0507
CHR	443	-	447365	448161	797	cd	0509		2		HVO_0509
CHR	444	+	447624	447783	160	as	0509				HVO_0509
CHR	445	+	448288	449177	890	cd	0511				HVO_0511
CHR	446	-	449280	449543	264	cd	0512			dRNA-Seq	HVO_0512
CHR	447	+	449684	450479	796	cd	0513				HVO_0513
CHR	448	-	450205	450937	733	cd	0514			dRNA-Seq	HVO_0514
CHR	449	-	451005	451124	120	ig	0514s				HVO_0514s
CHR	450	+	451071	451227	157	cd	0515				HVO_0515
CHR	451	+	451347	451428	82	ig	0515s				HVO_0515s
CHR	452	-	451419	451899	481	as	0516				HVO_0516
CHR	453	+	451495	452071	577	cd	0516				HVO_0516
CHR	454	-	452002	452428	427	tRNA	0517				HVO_0517
CHR	455	+	452835	456411	3577	cd	0519		3		HVO_0519
CHR	456	-	454104	454208	105	as	0519				HVO_0519
CHR	457	-	455207	455273	67	as	0520				HVO_0520
CHR	458	-	456175	457521	1347	is	0521				HVO_0521
CHR	459	+	457851	458822	972	tRNA	0523				HVO_0523
CHR	460	-	458932	459042	111	as	0526				HVO_0526
CHR	461	-	459256	459531	276	is	0527				HVO_0527
CHR	462	-	460283	461375	1093	cd	0528			dRNA-Seq	HVO_0528
CHR	463	+	461348	461694	347	cd	0529_A				HVO_0529_A
CHR	464	-	461460	461539	80	as	0529_A				HVO_0529_A
CHR	465	+	461835	465223	3389	cd	0530		3	dRNA-Seq	HVO_0530
CHR	466	-	463667	463706	40	as	0531				HVO_0531
CHR	467	-	463719	463747	29	as	0531				HVO_0531
CHR	468	+	465272	466571	1300	cd	0534				HVO_0534
CHR	469	-	466278	467282	1005	cd	0535				HVO_0535
CHR	470	+	467705	468680	976	cd	0536			dRNA-Seq	HVO_0536
CHR	471	-	467715	474007	6293	cd	0537		5	dRNA-Seq	HVO_0537
CHR	472	+	468784	469018	235	as	0538				HVO_0538
CHR	473	+	469158	469237	80	as	0539				HVO_0539
CHR	474	+	469519	469624	106	as	0539				HVO_0539
CHR	475	-	474199	474476	278	cd	0543			dRNA-Seq	HVO_0543
CHR	476	+	474722	476134	1413	cd	0544				HVO_0544
CHR	477	+	476210	477207	998	cd	0545		2		HVO_0545
CHR	478	+	477305	477437	133	as	0547				HVO_0547
CHR	479	-	477678	477898	221	is	0547				HVO_0547
CHR	480	+	477680	477911	232	as	0547				HVO_0547
CHR	481	-	478154	480465	2312						HVO_
CHR	482	-	481005	486111	5107	cd	0551		2		HVO_0551
CHR	483	-	489220	489437	218	as	0554				HVO_0554
CHR	484	+	491587	491710	124	is	0555				HVO_0555
CHR	485	-	491972	492418	447	as	0556				HVO_0556
CHR	486	+	492092	493313	1222	cd	0556		2	dRNA-Seq	HVO_0556
CHR	487	-	492644	492685	42	as	0556				HVO_0556
CHR	488	-	492732	492897	166	as	0556				HVO_0556
CHR	489	-	493471	494101	631	is	0558				HVO_0558
CHR	490	+	493473	494005	533	as	0558				HVO_0558
CHR	491	+	494496	494894	399	cd	0559	+		dRNA-Seq	HVO_0559
CHR	492	-	494852	495920	1069	cd	0560	+	2	dRNA-Seq	HVO_0560
CHR	493	+	495209	495311	103	as	0561				HVO_0561
CHR	494	-	496015	498042	2028	cd	0562		2		HVO_0562
CHR	495	+	497882	498055	174	as	0563				HVO_0563
CHR	496	-	498076	499274	1199	cd	0564				HVO_0564
CHR	497	+	499732	500649	918	cd	0565				HVO_0565
CHR	498	+	505111	506475	1365	cd	0568	+			HVO_0568
CHR	499	-	506243	507267	1025	cd	0569	+		dRNA-Seq	HVO_0569
CHR	500	-	507719	509545	1827	cd	0570		2	dRNA-Seq	HVO_0570
CHR	501	+	507739	507900	162	as	0570				HVO_0570
CHR	502	+	509900	512479	2580	as	0573		2		HVO_0573
CHR	503	+	513217	513873	657	cd	0576	+			HVO_0576
CHR	504	-	513255	513804	550	cd	0577	+			HVO_0577
CHR	505	-	513816	513975	160	as	0578				HVO_0578
CHR	506	-	514189	514838	650	cd	0579			dRNA-Seq	HVO_0579
CHR	507	+	515007	516340	1334	cd	0580	+		dRNA-Seq	HVO_0580
CHR	508	-	515683	518320	2638	cd	0581	+	3		HVO_0581
CHR	509	+	516441	516467	27	as	0581				HVO_0581
CHR	510	+	516910	516968	59	as	0581				HVO_0581
CHR	511	+	517120	517172	53	as	0581				HVO_0581
CHR	512	+	517793	517913	121	as	0583				HVO_0583
CHR	513	+	518490	518809	320	tRNA	0584				HVO_0584
CHR	514	+	518867	520516	1650	cd	0585		2	dRNA-Seq	HVO_0585
CHR	515	+	520827	521153	327	is	0587				HVO_0587
CHR	516	+	521472	521630	159	is	0588				HVO_0588
CHR	517	+	522302	524807	2506	cd	0589		3		HVO_0589
CHR	518	+	525505	525839	335	is	0592				HVO_0592
CHR	519	-	526035	526191	157	as	0593				HVO_0593
CHR	520	-	526346	526943	598	cd	0594	+			HVO_0594
CHR	521	+	527077	527655	579	cd	0595			dRNA-Seq	HVO_0595
CHR	522	+	527897	528815	919	cd	0596				HVO_0596
CHR	523	-	529558	529621	64	as	0598				HVO_0598
CHR	524	-	529629	529852	224	as	0598				HVO_0598
CHR	525	+	529886	530710	825	ig	0598s				HVO_0598s
CHR	526	-	529988	530534	547	cd	0599			dRNA-Seq	HVO_0599
CHR	527	+	530914	532798	1885	cd	0600		2		HVO_0600
CHR	528	-	532489	533340	852	cd	0602	+			HVO_0602
CHR	529	+	533018	533122	105	as	0602				HVO_0602
CHR	530	-	533905	534521	617	cd	0603			dRNA-Seq	HVO_0603
CHR	531	+	534916	535382	467	cd	0604			dRNA-Seq	HVO_0604
CHR	532	-	536413	536558	146	is	0605				HVO_0605
CHR	533	-	536808	537496	689	cd	0606			dRNA-Seq	HVO_0606
CHR	534	-	537668	538723	1056	cd	0607			dRNA-Seq	HVO_0607
CHR	535	+	539033	539164	132	is	0608				HVO_0608
CHR	536	+	541184	543210	2027	cd	0610		2	dRNA-Seq	HVO_0610
CHR	537	+	543758	544223	466	cd	0612			dRNA-Seq	HVO_0612
CHR	538	+	550811	550943	133	as	0620				HVO_0620
CHR	539	-	552685	554619	1935	cd	0621			dRNA-Seq	HVO_0621
CHR	540	+	554705	555113	409	as	0622				HVO_0622
CHR	541	+	555257	555307	51	as	0622				HVO_0622
CHR	542	-	555473	555631	159	is	0622				HVO_0622
CHR	543	+	556074	556156	83	is	0623				HVO_0623
CHR	544	+	556405	557083	679	cd	0624			dRNA-Seq	HVO_0624
CHR	545	-	557147	557292	146	is	0625				HVO_0625
CHR	546	+	557167	557249	83	as	0625				HVO_0625
CHR	547	-	557306	557874	569	cd	0626			dRNA-Seq	HVO_0626
CHR	548	+	558061	560856	2796	cd	0627				HVO_0627
CHR	549	-	560698	560811	114	as	0627				HVO_0627
CHR	550	+	560907	565259	4353	cd	0628	+	4	dRNA-Seq	HVO_0628
CHR	551	-	561544	561784	241	as	0628				HVO_0628
CHR	552	-	562464	562486	23	as	0628				HVO_0628
CHR	553	-	562507	562745	239	as	0629				HVO_0629
CHR	554	-	564926	570536	5611	cd	0633	+	3	dRNA-Seq	HVO_0633
CHR	555	+	569481	569590	110	as	0634				HVO_0634
CHR	556	+	570775	570952	178	ig	0634s				HVO_0634s
CHR	557	+	571273	572704	1432	cd	0635		2	dRNA-Seq	HVO_0635
CHR	558	+	573278	573447	170	is	0637				HVO_0637
CHR	559	-	574526	575455	930	cd	0639			dRNA-Seq	HVO_0639
CHR	560	+	575673	575896	224	tRNA	0640				HVO_0640
CHR	561	-	576438	576589	152	is	0641				HVO_0641
CHR	562	+	576724	577487	764	cd	0642	+	2	dRNA-Seq	HVO_0642
CHR	563	-	577120	579327	2208	cd	0644	+	2	dRNA-Seq	HVO_0644
CHR	564	+	577604	577746	143	as	0644				HVO_0644
CHR	565	+	577794	578307	514	as	0644				HVO_0644
CHR	566	+	578546	578729	184	as	0644				HVO_0644
CHR	567	+	579682	580037	356	is	0646				HVO_0646
CHR	568	+	580092	582626	2535	cd	0647		2	dRNA-Seq	HVO_0647
CHR	569	-	581526	581619	94	as	0648				HVO_0648
CHR	570	-	582072	582195	124	as	0648				HVO_0648
CHR	571	-	582235	582610	376	as	0648				HVO_0648
CHR	572	-	582713	583028	316	cd	0649			dRNA-Seq	HVO_0649
CHR	573	-	583193	584616	1424	cd	0650		5		HVO_0650
CHR	574	+	583565	583623	59	as	0650				HVO_0650
CHR	575	+	584744	585925	1182	cd	0655			dRNA-Seq	HVO_0655
CHR	576	-	585572	586496	925	cd	0656			dRNA-Seq	HVO_0656
CHR	577	+	586679	586755	77	is	0651				HVO_0651
CHR	578	-	587438	588734	1297	cd	0658				HVO_0658
CHR	579	-	588916	589201	286	cd	0659				HVO_0659
CHR	580	+	589475	589688	214	is	0660				HVO_0660
CHR	581	+	590092	593106	3015	cd	0661		4		HVO_0661
CHR	582	+	593344	593372	29	as	0665				HVO_0665
CHR	583	+	593378	593427	50	as	0665				HVO_0665
CHR	584	+	594114	595644	1531	cd	0666			dRNA-Seq	HVO_0666
CHR	585	-	595213	595361	149	as	0666				HVO_0666
CHR	586	-	595573	598724	3152	cd	0667	+	3		HVO_0667
CHR	587	+	595823	595934	112	as	0667				HVO_0667
CHR	588	+	598960	599941	982	cd	0670				HVO_0670
CHR	589	-	600811	600867	57	as	0671				HVO_0671
CHR	590	-	601097	603528	2432	cd	0672		5		HVO_0672
CHR	591	-	603541	604009	469	cd	0676			dRNA-Seq	HVO_0676
CHR	592	-	604118	605693	1576	cd	0677			dRNA-Seq	HVO_0677
CHR	593	-	607178	607988	811	cd	0680				HVO_0680
CHR	594	+	608110	609411	1302	cd	0682			dRNA-Seq	HVO_0682
CHR	595	-	608328	608465	138	as	0682				HVO_0682
CHR	596	-	608889	611622	2734	cd	0681			dRNA-Seq	HVO_0681
CHR	597	+	609738	609884	147	as	0681				HVO_0681
CHR	598	+	611943	612479	537	cd	0683				HVO_0683
CHR	599	-	612160	614253	2094	cd	0684	+		dRNA-Seq	HVO_0684
CHR	600	+	614347	622970	8624	cd	0685	+	7	dRNA-Seq	HVO_0685
CHR	601	-	617001	617113	113	as	0690				HVO_0690
CHR	602	-	622811	623787	977	cd	0692			dRNA-Seq	HVO_0692
CHR	603	-	624667	625713	1047	cd	0694			dRNA-Seq	HVO_0694
CHR	604	+	625911	626129	219	cd	0695				HVO_0695
CHR	605	-	626014	626240	227	as	0695				HVO_0695
CHR	606	-	626393	626542	150	as	0696				HVO_0696
CHR	607	-	626666	626844	179	as	0696				HVO_0696
CHR	608	-	626906	629466	2561	cd	0697		5	dRNA-Seq	HVO_0697
CHR	609	+	627005	627181	177	is	0696				HVO_0696
CHR	610	+	629306	629391	86	as	0701				HVO_0701
CHR	611	-	629587	629869	283	as	0703				HVO_0703
CHR	612	+	629670	630037	368	cd	0703			dRNA-Seq	HVO_0703
CHR	613	-	629926	632199	2274	cd	0702				HVO_0702
CHR	614	+	630145	630349	205	as	0702				HVO_0702
CHR	615	+	632800	634490	1691						HVO_
CHR	616	-	634153	638758	4606	cd	0708		4		HVO_0708
CHR	617	+	638123	638288	166	as	0711				HVO_0711
CHR	618	-	639105	639353	249	cd	0712				HVO_0712
CHR	619	+	639333	645437	6105	cd	0714		6	dRNA-Seq	HVO_0714
CHR	620	-	644719	645819	1101	cd	0729	+		dRNA-Seq	HVO_0729
CHR	621	+	645641	645798	158	as	0720				HVO_0720
CHR	622	+	645933	646744	812	cd	0721			dRNA-Seq	HVO_0721
CHR	623	-	646595	647789	1195	cd	0722		2	dRNA-Seq	HVO_0722
CHR	624	+	646830	647146	317	as	0722				HVO_0722
CHR	625	+	648044	649271	1228	cd	0724			dRNA-Seq	HVO_0724
CHR	626	-	648950	650794	1845	cd	0725			dRNA-Seq	HVO_0725
CHR	627	-	651163	651957	795	cd	0727			dRNA-Seq	HVO_0727
CHR	628	-	651999	652295	297	cd	0728				HVO_0728
CHR	629	-	652431	653010	580	cd	0729			dRNA-Seq	HVO_0729
CHR	630	+	653144	653217	74	ig	0729s				HVO_0729s
CHR	631	+	653362	654553	1192	cd	0730			dRNA-Seq	HVO_0730
CHR	632	-	653661	654666	1006	cd	0731				HVO_0731
CHR	633	+	654883	654912	30	ig	0732s				HVO_0732s
CHR	634	+	655017	657775	2759	cd	0733	+	3	dRNA-Seq	HVO_0733
CHR	635	-	657090	657330	241	as	0734				HVO_0734
CHR	636	-	657453	659065	1613	cd	0736	+	3	dRNA-Seq	HVO_0736
CHR	637	+	657906	657956	51	as	0736				HVO_0736
CHR	638	+	658108	658422	315	as	0737				HVO_0737
CHR	639	+	659258	660326	1069	cd	0739	+		dRNA-Seq	HVO_0739
CHR	640	-	660119	663030	2912	cd	0740	+	3		HVO_0740
CHR	641	+	663301	665228	1928	cd	0743	+		dRNA-Seq	HVO_0743
CHR	642	-	664270	664372	103	as	0743				HVO_0743
CHR	643	-	664824	665816	993	as	0744				HVO_0744
CHR	644	-	665856	667032	1177	as	0745				HVO_0745
CHR	645	+	673755	675064	1310	cd	0753				HVO_0753
CHR	646	+	677063	679607	2545	cd	0754		3		HVO_0754
CHR	647	-	679478	679780	303	as	0757				HVO_0757
CHR	648	+	679616	680809	1194	cd	0757			dRNA-Seq	HVO_0757
CHR	649	-	680059	680215	157	as	0757				HVO_0757
CHR	650	-	680258	680438	181	as	0757				HVO_0757
CHR	651	-	680604	680904	301	cd	0758	+		dRNA-Seq	HVO_0758
CHR	652	+	681051	683293	2243	cd	0759		2	dRNA-Seq	HVO_0759
CHR	653	+	683454	684545	1092	cd	0761		2		HVO_0761
CHR	654	-	684575	685204	630	cd	0763				HVO_0763
CHR	655	+	684639	684953	315	as	0763				HVO_0763
CHR	656	+	685017	685107	91	as	0763				HVO_0763
CHR	657	+	685300	685440	141	ig	0763s				HVO_0763s
CHR	658	+	685535	686615	1081	cd	0764			dRNA-Seq	HVO_0764
CHR	659	-	687677	688498	822	cd	0766		2		HVO_0766
CHR	660	+	687718	687986	269	as	0766				HVO_0766
CHR	661	+	688643	690781	2139	cd	0768				HVO_0768
CHR	662	-	690027	691643	1617	cd	0769	+	2	dRNA-Seq	HVO_0769
CHR	663	-	692574	692925	352	cd	0772				HVO_0772
CHR	664	-	693037	693171	135	ig	0772s				HVO_0772s
CHR	665	+	693305	695374	2070	cd	0773	+	2		HVO_0773
CHR	666	-	695037	695883	847	cd	0775			dRNA-Seq	HVO_0775
CHR	667	+	696198	696407	210	is	0776				HVO_0776
CHR	668	+	696784	697147	364	cd	0777				HVO_0777
CHR	669	+	697225	700386	3162	cd	0778		2	dRNA-Seq	HVO_0778
CHR	670	-	699650	699812	163	as	0779				HVO_0779
CHR	671	-	700227	702329	2103	cd	0780	+	3		HVO_0780
CHR	672	+	702497	705610	3114	cd	0783		2		HVO_0783
CHR	673	-	704027	704211	185	as	0783				HVO_0783
CHR	674	-	704340	704432	93	as	0783				HVO_0783
CHR	675	+	705707	706143	437	cd	0785				HVO_0785
CHR	676	-	705962	705996	35	as	0785				HVO_0785
CHR	677	+	706286	706611	326	as	0786				HVO_0786
CHR	678	-	706313	706517	205	is	0786				HVO_0786
CHR	679	+	706972	711127	4156	cd	0787		5		HVO_0787
CHR	680	-	709787	709959	173	as	0790				HVO_0790
CHR	681	+	711362	711626	265	ig	0791s				HVO_0791s
CHR	682	+	711653	712948	1296	cd	0792			dRNA-Seq	HVO_0792
CHR	683	-	712322	712495	174	as	0792				HVO_0792
CHR	684	-	712569	715626	3058	cd	0793		3	dRNA-Seq	HVO_0793
CHR	685	+	715471	715546	76	as	0795				HVO_0795
CHR	686	+	715865	717263	1399	cd	0796	+	2		HVO_0796
CHR	687	-	717119	719084	1966	cd	0798	+		dRNA-Seq	HVO_0798
CHR	688	+	719391	719753	363	cd	0799			dRNA-Seq	HVO_0799
CHR	689	-	719427	719641	215	as	0799				HVO_0799
CHR	690	-	719760	722476	2717	cd	0800		3		HVO_0800
CHR	691	+	720679	720839	161	as	0801				HVO_0801
CHR	692	+	721068	721159	92	as	0801				HVO_0801
CHR	693	+	722078	722301	224	as	0802				HVO_0802
CHR	694	-	722669	723859	1191	cd	0803				HVO_0803
CHR	695	+	723677	723949	273	as	0803				HVO_0803
CHR	696	-	724168	726997	2830	cd	0805		4	dRNA-Seq	HVO_0805
CHR	697	+	726462	726563	102	as	0807				HVO_0807
CHR	698	-	727139	733851	6713	cd	0809		4	dRNA-Seq	HVO_0809
CHR	699	-	733968	734072	105	is	0813				HVO_0813
CHR	700	+	734464	734888	425	cd	0814			dRNA-Seq	HVO_0814
CHR	701	-	734798	735708	911	cd	0815			dRNA-Seq	HVO_0815
CHR	702	+	735594	735697	104	as	0815				HVO_0815
CHR	703	-	736554	737746	1193	cd	0817				HVO_0817
CHR	704	+	738397	739188	792	is	0818				HVO_0818
CHR	705	+	739222	740622	1401	cd	0819		2	dRNA-Seq	HVO_0819
CHR	706	+	740880	743425	2546	cd	0821		3		HVO_0821
CHR	707	+	743501	744638	1138	cd	0824			dRNA-Seq	HVO_0824
CHR	708	-	744465	744604	140	as	0824				HVO_0824
CHR	709	-	744714	746601	1888	cd	0825		2	dRNA-Seq	HVO_0825
CHR	710	+	746274	746452	179	as	0826				HVO_0826
CHR	711	+	746716	752362	5647	cd	0827		7	dRNA-Seq	HVO_0827
CHR	712	-	748376	748448	73	as	0829				HVO_0829
CHR	713	-	752081	753826	1746	cd	0834	+	2		HVO_0834
CHR	714	+	752407	752577	171	as	0834				HVO_0834
CHR	715	+	752686	752786	101	as	0834				HVO_0834
CHR	716	+	753360	753389	30	as	0835				HVO_0835
CHR	717	+	754117	755461	1345	cd	0836			dRNA-Seq	HVO_0836
CHR	718	+	755467	756859	1393	cd	0837	+		dRNA-Seq	HVO_0837
CHR	719	-	756139	756304	166	as	0837				HVO_0837
CHR	720	-	756338	761174	4837	cd	0838		8	dRNA-Seq	HVO_0838
CHR	721	+	761452	762239	788	cd	0847			dRNA-Seq	HVO_0847
CHR	722	-	761848	762605	758	cd	0848				HVO_0848
CHR	723	+	762736	763382	647	cd	0849	+		dRNA-Seq	HVO_0849
CHR	724	-	762848	764150	1303	cd	0850	+		dRNA-Seq	HVO_0850
CHR	725	+	763554	763760	207	as	0850				HVO_0850
CHR	726	+	764333	769139	4807	cd	0852	+	4	dRNA-Seq	HVO_0852
CHR	727	-	768956	770073	1118	cd	0855	+	2		HVO_0855
CHR	728	-	770103	770309	207	cd	0857			dRNA-Seq	HVO_0857
CHR	729	+	770530	774586	4057	cd	0858				HVO_0858
CHR	730	-	773760	773893	134	as	0858				HVO_0858
CHR	731	-	774186	774337	152	as	0858				HVO_0858
CHR	732	+	774638	779538	4901	cd	0859		5		HVO_0859
CHR	733	-	779610	779678	69	is	0864				HVO_0864
CHR	734	+	780358	780884	527	cd	0864_A				HVO_0864_A
CHR	735	-	780745	780875	131	as	0864_A				HVO_0864_A
CHR	736	-	780922	781119	198	as	0864_A				HVO_0864_A
CHR	737	+	781205	783921	2717						HVO_
CHR	738	-	782271	782925	655	cd	0866				HVO_0866
CHR	739	-	783464	783605	142	as	0867				HVO_0867
CHR	740	-	783752	791218	7467	cd	0868		3	dRNA-Seq	HVO_0868
CHR	741	+	783938	784215	278	as	0868				HVO_0868
CHR	742	+	784263	784968	706	as	0868				HVO_0868
CHR	743	+	785157	785180	24	as	0869				HVO_0869
CHR	744	+	785803	785893	91	as	0869				HVO_0869
CHR	745	+	787280	787396	117	as	0869				HVO_0869
CHR	746	+	791278	791870	593	cd	0871		2		HVO_0871
CHR	747	-	791354	791446	93	as	0871				HVO_0871
CHR	748	-	791747	792288	542	cd	0873				HVO_0873
CHR	749	-	792315	792419	105	as	0873s				HVO_0873s
CHR	750	+	792387	795873	3487	cd	0874		4		HVO_0874
CHR	751	-	793015	793105	91	as	0874				HVO_0874
CHR	752	-	793222	793422	201	as	0874				HVO_0874
CHR	753	-	795832	796200	369	is	0878				HVO_0878
CHR	754	-	796815	797255	441	cd	0879			dRNA-Seq	HVO_0879
CHR	755	+	797453	800963	3511	cd	0880	+	3	dRNA-Seq	HVO_0880
CHR	756	-	797757	797888	132	as	0880				HVO_0880
CHR	757	-	798092	798259	168	as	0880				HVO_0880
CHR	758	-	798322	798448	127	as	0880				HVO_0880
CHR	759	-	799209	799235	27	as	0881				HVO_0881
CHR	760	-	799618	799761	144	as	0882				HVO_0882
CHR	761	-	800112	801911	1800	cd	0883	+	2	dRNA-Seq	HVO_0883
CHR	762	+	801006	801044	39	as	0883				HVO_0883
CHR	763	+	802104	802541	438	cd	0885	+	2		HVO_0885
CHR	764	-	802126	805133	3008	cd	0887	+	2		HVO_0887
CHR	765	+	802695	802801	107	as	0887				HVO_0887
CHR	766	+	803500	803706	207	as	0888				HVO_0888
CHR	767	+	805393	806018	626	cd	0889			dRNA-Seq	HVO_0889
CHR	768	-	806472	810015	3544	cd	0890		3		HVO_0890
CHR	769	+	809962	811794	1833	cd	0893			dRNA-Seq	HVO_0893
CHR	770	+	811842	813994	2153	cd	0894	+		dRNA-Seq	HVO_0894
CHR	771	-	813544	814082	539	cd	0895	+		dRNA-Seq	HVO_0895
CHR	772	+	814398	816126	1729	cd	0896				HVO_0896
CHR	773	-	815900	816123	224	is	0897				HVO_0897
CHR	774	+	817351	818343	993	is	0899				HVO_0899
CHR	775	-	817398	817513	116	as	0899				HVO_0899
CHR	776	+	818562	819248	687	is	0900				HVO_0900
CHR	777	+	819611	822946	3336	cd	0901	+	4		HVO_0901
CHR	778	-	821395	821472	78	as	0902				HVO_0902
CHR	779	-	821771	821810	40	as	0903				HVO_0903
CHR	780	-	822007	822031	25	as	0903				HVO_0903
CHR	781	-	822041	822065	25	as	0903				HVO_0903
CHR	782	-	822171	822271	101	as	0905				HVO_0905
CHR	783	-	822360	822728	369	as	0905				HVO_0905
CHR	784	-	822840	823819	980	cd	0904	+	2		HVO_0904
CHR	785	+	822957	823020	64	as	0904				HVO_0904
CHR	786	+	823756	823889	134	cd	0906_A				HVO_0906_A
CHR	787	-	823972	826989	3018	cd	0907		4	dRNA-Seq	HVO_0907
CHR	788	+	824099	824181	83	as	0907				HVO_0907
CHR	789	+	824328	824606	279	as	0907				HVO_0907
CHR	790	+	825566	825642	77	as	0907				HVO_0907
CHR	791	+	826600	826990	391	as	0910				HVO_0910
CHR	792	+	827158	828251	1094	cd	0911			dRNA-Seq	HVO_0911
CHR	793	+	828302	828843	542	cd	0912				HVO_0912
CHR	794	-	828771	830095	1325	cd	0913				HVO_0913
CHR	795	+	830376	832321	1946	cd	0914	+	2	dRNA-Seq	HVO_0914
CHR	796	-	831902	831987	86	as	0915				HVO_0915
CHR	797	-	832040	833020	981	cd	0916			dRNA-Seq	HVO_0916
CHR	798	+	832514	832648	135	as	0916				HVO_0916
CHR	799	+	833168	835058	1891	cd	0917	+	4	dRNA-Seq	HVO_0917
CHR	800	-	835132	835417	286	is	0921				HVO_0921
CHR	801	+	835382	835849	468	cd	0922			dRNA-Seq	HVO_0922
CHR	802	+	835912	836483	572	cd	0922			dRNA-Seq	HVO_0922
CHR	803	+	836655	838053	1399	cd	0924			dRNA-Seq	HVO_0924
CHR	804	-	836736	836960	225	as	0924				HVO_0924
CHR	805	-	838168	838255	88	ig	0924s				HVO_0924s
CHR	806	+	838368	838487	120	is	0925				HVO_0925
CHR	807	-	838980	840276	1297	cd	0926			dRNA-Seq	HVO_0926
CHR	808	+	839983	840405	423	cd	0925				HVO_0925
CHR	809	-	840396	840432	37	as	0925				HVO_0925
CHR	810	-	840545	841951	1407	is	0929				HVO_0929
CHR	811	+	840776	840993	218	tRNA	0928				HVO_0928
CHR	812	+	842167	842560	394	ig	0929s				HVO_0929s
CHR	813	-	842262	843129	868	cd	0930			dRNA-Seq	HVO_0930
CHR	814	+	842611	842733	123	as	0930				HVO_0930
CHR	815	+	842795	842818	24	as	0930				HVO_0930
CHR	816	+	843257	843604	348	is	0931				HVO_0931
CHR	817	-	843298	843973	676	cd	0932				HVO_0932
CHR	818	+	843662	844058	397	as	0932				HVO_0932
CHR	819	+	844133	844839	707	cd	0934				HVO_0934
CHR	820	-	844775	847543	2769	cd	0933				HVO_0933
CHR	821	+	847686	849698	2013	cd	0935			dRNA-Seq	HVO_0935
CHR	822	+	849798	850892	1095	cd	0936	+			HVO_0936
CHR	823	-	850138	850968	831	cd	0937	+		dRNA-Seq	HVO_0937
CHR	824	-	851012	855709	4698	cd	0938		5		HVO_0938
CHR	825	+	855550	859368	3819	cd	0943		6	dRNA-Seq	HVO_0943
CHR	826	-	856955	856994	40	as	0945				HVO_0945
CHR	827	-	857002	857035	34	as	0945				HVO_0945
CHR	828	-	857182	857321	140	as	0945				HVO_0945
CHR	829	-	857497	857628	132	as	0945				HVO_0945
CHR	830	-	859120	859715	596	cd	0949			dRNA-Seq	HVO_0949
CHR	831	+	859436	859836	401	as	0949				HVO_0949
CHR	832	+	859884	860946	1063	cd	0950			dRNA-Seq	HVO_0950
CHR	833	-	860468	861656	1189	cd	0951				HVO_0951
CHR	834	+	861325	861461	137	as	0951				HVO_0951
CHR	835	-	861684	864862	3179	cd	0952		3	dRNA-Seq	HVO_0952
CHR	836	-	865094	865147	54	is	0955				HVO_0955
CHR	837	+	865104	865170	67	as	0955				HVO_0955
CHR	838	-	866124	866859	736	cd	0956		2		HVO_0956
CHR	839	-	866908	867404	497	as	0958				HVO_0958
CHR	840	-	867591	867670	80	is	0959				HVO_0959
CHR	841	+	868349	870634	2286	cd	0960		4	dRNA-Seq	HVO_0960
CHR	842	+	870718	871134	417	cd	0964			dRNA-Seq	HVO_0964
CHR	843	+	871209	872705	1497	cd	0965			dRNA-Seq	HVO_0965
CHR	844	+	872984	873782	799	is	0966				HVO_0966
CHR	845	-	873658	874350	693	cd	0967				HVO_0967
CHR	846	+	873964	873987	24	as	0967				HVO_0967
CHR	847	+	874086	874413	328	as	0967				HVO_0967
CHR	848	+	874878	876101	1224	is	0968				HVO_0968
CHR	849	+	876517	876663	147	as	0969				HVO_0969
CHR	850	-	877713	877936	224	is	0969				HVO_0969
CHR	851	+	878343	878645	303	as	0969				HVO_0969
CHR	852	-	879307	885112	5806	cd	0970		5	dRNA-Seq	HVO_0970
CHR	853	+	880717	881271	555	as	0971				HVO_0971
CHR	854	+	883123	883291	169	as	0972				HVO_0972
CHR	855	+	883320	883364	45	as	0972				HVO_0972
CHR	856	+	883661	884472	812	as	0973				HVO_0973
CHR	857	+	885395	887157	1763	cd	0975				HVO_0975
CHR	858	+	887300	899884	12585	cd	0976		13		HVO_0976
CHR	859	-	888529	888686	158	as	0977				HVO_0977
CHR	860	-	889646	889707	62	as	0978				HVO_0978
CHR	861	-	891476	891559	84	as	0980				HVO_0980
CHR	862	-	898385	900079	1695	cd	0989	+			HVO_0989
CHR	863	+	900441	902557	2117	cd	0990		2	dRNA-Seq	HVO_0990
CHR	864	-	902043	902198	156	as	0991				HVO_0991
CHR	865	-	902244	902683	440	cd	0992	+		dRNA-Seq	HVO_0992
CHR	866	+	902574	902672	99	as	0992				HVO_0992
CHR	867	+	902964	904495	1532	cd	0994	+		dRNA-Seq	HVO_0994
CHR	868	-	904210	905394	1185	cd	0995	+			HVO_0995
CHR	869	+	905473	906683	1211	cd	0996			dRNA-Seq	HVO_0996
CHR	870	+	906809	908251	1443	cd	0997	+	2	dRNA-Seq	HVO_0997
CHR	871	-	907424	907528	105	as	0997				HVO_0997
CHR	872	-	907710	911452	3743	cd	0999	+	2		HVO_0999
CHR	873	+	908285	908454	170	as	0999				HVO_0999
CHR	874	+	908745	908873	129	as	0999				HVO_0999
CHR	875	+	909006	909157	152	as	0999				HVO_0999
CHR	876	+	909175	909198	24	as	0999				HVO_0999
CHR	877	+	909212	909292	81	as	0999				HVO_0999
CHR	878	+	911688	912029	342	cd	1001				HVO_1001
CHR	879	+	912143	912636	494	cd	1002				HVO_1002
CHR	880	+	913073	914093	1021	cd	1003	+		dRNA-Seq	HVO_1003
CHR	881	-	913580	913762	183	as	1003				HVO_1003
CHR	882	-	913889	914233	345	cd	1004	+		dRNA-Seq	HVO_1004
CHR	883	-	914445	916062	1618	cd	1005		2		HVO_1005
CHR	884	+	916438	917710	1273	is	1007				HVO_1007
CHR	885	-	916473	916802	330	as	1007				HVO_1007
CHR	886	-	916907	917249	343	as	1007				HVO_1007
CHR	887	-	917269	918614	1346	cd	1008	+		dRNA-Seq	HVO_1008
CHR	888	+	917769	917897	129	as	1008				HVO_1008
CHR	889	+	919007	920067	1061	cd	1009			dRNA-Seq	HVO_1009
CHR	890	-	920189	920349	161	is	1010				HVO_1010
CHR	891	-	920492	922950	2459	cd	1011		3	dRNA-Seq	HVO_1011
CHR	892	+	923051	924001	951	cd	1014			dRNA-Seq	HVO_1014
CHR	893	-	923872	924820	949	cd	1015	+	2		HVO_1015
CHR	894	+	924025	924130	106	as	1015				HVO_1015
CHR	895	+	924146	924708	563	as	1016				HVO_1016
CHR	896	-	924856	924892	37	ig	1016s1				HVO_1016s1
CHR	897	-	924899	924953	55	ig	1016s2				HVO_1016s2
CHR	898	+	925306	925851	546	is	1017				HVO_1017
CHR	899	-	925568	925840	273	is	1017				HVO_1017
CHR	900	+	925909	927842	1934	cd	1018			dRNA-Seq	HVO_1018
CHR	901	-	929482	930872	1391	cd	1020			dRNA-Seq	HVO_1020
CHR	902	+	930448	930685	238	as	1020				HVO_1020
CHR	903	+	931305	931445	141	is	1021				HVO_1021
CHR	904	+	931837	934036	2200	cd	1022		2		HVO_1022
CHR	905	-	933877	935412	1536	cd	1024		2		HVO_1024
CHR	906	+	934120	934375	256	as	1024				HVO_1024
CHR	907	+	934681	934884	204	as	1025				HVO_1025
CHR	908	+	935538	936864	1327	cd	1026		2	dRNA-Seq	HVO_1026
CHR	909	-	935710	935866	157	as	1026				HVO_1026
CHR	910	-	936026	936853	828	cd	1027	+		dRNA-Seq	HVO_1027
CHR	911	-	937084	937837	754	cd	1028				HVO_1028
CHR	912	+	937251	937359	109	as	1028				HVO_1028
CHR	913	-	937848	941275	3428	cd	1030		3		HVO_1030
CHR	914	-	941305	946248	4944	cd	1033		4		HVO_1033
CHR	915	+	945276	945418	143	as	1035				HVO_1035
CHR	916	+	945589	945812	224	as	1035				HVO_1035
CHR	917	+	946402	947688	1287	cd	1037		2	dRNA-Seq	HVO_1037
CHR	918	+	947852	948380	529	ig	1038s				HVO_1038s
CHR	919	+	948410	948613	204	as	1039				HVO_1039
CHR	920	-	948477	948617	141	is	1039				HVO_1039
CHR	921	-	948683	949814	1132	cd	1040			dRNA-Seq	HVO_1040
CHR	922	+	949367	949504	138	as	1040				HVO_1040
CHR	923	+	949652	949788	137	as	1040				HVO_1040
CHR	924	+	950147	951404	1258	cd	1042				HVO_1042
CHR	925	-	950914	951181	268	as	1042				HVO_1042
CHR	926	-	951264	951920	657	cd	1043				HVO_1043
CHR	927	-	951997	952871	875	cd	1044				HVO_1044
CHR	928	-	953025	953112	88	as	1045				HVO_1045
CHR	929	+	953058	954629	1572	cd	1045		3	dRNA-Seq	HVO_1045
CHR	930	-	954362	956709	2348	cd	1048				HVO_1048
CHR	931	+	956807	956931	125	ig	1048s				HVO_1048s
CHR	932	+	956979	958880	1902	cd	1049	+	2	dRNA-Seq	HVO_1049
CHR	933	-	958605	960373	1769	cd	1052	+	2		HVO_1052
CHR	934	+	960575	962834	2260	cd	1053		3	dRNA-Seq	HVO_1053
CHR	935	+	963153	964649	1497	cd	1056				HVO_1056
CHR	936	-	964340	968293	3954	cd	1057		3	dRNA-Seq	HVO_1057
CHR	937	+	969513	971450	1938	cd	1061		2		HVO_1061
CHR	938	-	971558	972091	534	cd	1063		2		HVO_1063
CHR	939	+	971627	971824	198	as	1063				HVO_1063
CHR	940	+	971872	971995	124	as	1064				HVO_1064
CHR	941	-	972271	977684	5414	cd	1065		5		HVO_1065
CHR	942	+	977873	978411	539	cd	1070			dRNA-Seq	HVO_1070
CHR	943	+	978458	979001	544	cd	1071			dRNA-Seq	HVO_1071
CHR	944	+	979097	981514	2418	cd	1072		4	dRNA-Seq	HVO_1072
CHR	945	-	980679	981219	541	as	1074				HVO_1074
CHR	946	-	981237	981644	408	cd	1075				HVO_1075
CHR	947	+	981782	982944	1163	cd	1076			dRNA-Seq	HVO_1076
CHR	948	-	982679	988629	5951	cd	1077		8	dRNA-Seq	HVO_1077
CHR	949	+	987639	987813	175	as	1083				HVO_1083
CHR	950	+	988708	989305	598	ig	1083s				HVO_1083s
CHR	951	-	988712	988822	111	ig	1083s				HVO_1083s
CHR	952	-	988924	990349	1426	cd	1084				HVO_1084
CHR	953	+	990575	997407	6833	cd	1085		6		HVO_1085
CHR	954	-	994476	994568	93	as	1088				HVO_1088
CHR	955	-	997162	997240	79	as	1090				HVO_1090
CHR	956	-	997326	997467	142	ig	1090s				HVO_1090s
CHR	957	-	997494	999953	2460	cd	1091		4		HVO_1091
CHR	958	-	1000238	1000791	554	cd	1095			dRNA-Seq	HVO_1095
CHR	959	-	1001098	1004065	2968	cd	1096		3		HVO_1096
CHR	960	-	1004090	1006782	2693	cd	1099		4		HVO_1099
CHR	961	+	1006984	1007759	776	cd	1102				HVO_1102
CHR	962	-	1007221	1008650	1430	cd	1103	+	2	dRNA-Seq	HVO_1103
CHR	963	+	1008790	1009445	656	cd	1105			dRNA-Seq	HVO_1105
CHR	964	-	1009386	1009586	201	ig	1105s				HVO_1105s
CHR	965	+	1009505	1009882	378	as	1106				HVO_1106
CHR	966	-	1009651	1010944	1294	cd	1106			dRNA-Seq	HVO_1106
CHR	967	+	1010197	1010399	203	as	1106				HVO_1106
CHR	968	+	1010942	1011121	180	ig	1106s				HVO_1106s
CHR	969	-	1011527	1014411	2885	cd	1107		4		HVO_1107
CHR	970	+	1014562	1017033	2472	cd	1111		2	dRNA-Seq	HVO_1111
CHR	971	+	1017079	1019637	2559	cd	1113	+	2		HVO_1113
CHR	972	-	1018303	1019613	1311	cd	1115	+	2		HVO_1115
CHR	973	+	1019813	1020923	1111	cd	1117		2	dRNA-Seq	HVO_1117
CHR	974	-	1020449	1021217	769	cd	1119			dRNA-Seq	HVO_1119
CHR	975	+	1020988	1021047	60	as	1119				HVO_1119
CHR	976	+	1021153	1023194	2042	cd	1120		3	dRNA-Seq	HVO_1120
CHR	977	-	1022597	1022738	142	as	1121				HVO_1121
CHR	978	-	1022909	1024235	1327	cd	1123	+		dRNA-Seq	HVO_1123
CHR	979	+	1024469	1024709	241	cd	1124				HVO_1124
CHR	980	-	1024593	1026164	1572	cd	1125			dRNA-Seq	HVO_1125
CHR	981	+	1025277	1025321	45	as	1125				HVO_1125
CHR	982	+	1026017	1026170	154	as	1125				HVO_1125
CHR	983	-	1026793	1028176	1384	is	1126				HVO_1126
CHR	984	+	1028831	1030871	2041	cd	1128	+	2	dRNA-Seq	HVO_1128
CHR	985	-	1030221	1030521	301	as	1129				HVO_1129
CHR	986	-	1030599	1033183	2585	cd	1130	+	3	dRNA-Seq	HVO_1130
CHR	987	+	1031562	1031705	144	as	1131				HVO_1131
CHR	988	+	1033378	1033956	579	cd	1133				HVO_1133
CHR	989	-	1033706	1036260	2555	cd	1134	+			HVO_1134
CHR	990	+	1033993	1034151	159	as	1134				HVO_1134
CHR	991	+	1034266	1034504	239	as	1134				HVO_1134
CHR	992	+	1036441	1037015	575	cd	1135				HVO_1135
CHR	993	-	1037316	1037394	79	is	1136				HVO_1136
CHR	994	+	1038473	1040230	1758	cd	1137			dRNA-Seq	HVO_1137
CHR	995	-	1039947	1039971	25	as	1137				HVO_1137
CHR	996	-	1039990	1041086	1097	cd	1138			dRNA-Seq	HVO_1138
CHR	997	-	1041099	1042393	1295	cd	1139			dRNA-Seq	HVO_1139
CHR	998	+	1042445	1044062	1618	cd	1140			dRNA-Seq	HVO_1140
CHR	999	-	1042584	1042692	109	as	1140				HVO_1140
CHR	1000	-	1043544	1043964	421	cd	1141				HVO_1141
CHR	1001	+	1044138	1044540	403	cd	1142			dRNA-Seq	HVO_1142
CHR	1002	-	1044237	1045070	834	cd	1143				HVO_1143
CHR	1003	+	1045369	1046196	828	cd	1144	+		dRNA-Seq	HVO_1144
CHR	1004	-	1045790	1048435	2646	cd	1145	+	4		HVO_1145
CHR	1005	+	1048134	1048254	121	as	1148				HVO_1148
CHR	1006	+	1048413	1048497	85	ig	1148s				HVO_1148s
CHR	1007	+	1048560	1049058	499	tRNA	1149				HVO_1149
CHR	1008	+	1049184	1052656	3473	cd	1150		4	dRNA-Seq	HVO_1150
CHR	1009	-	1056266	1057289	1024	is	1159				HVO_1159
CHR	1010	+	1056865	1056929	65	as	1159				HVO_1159
CHR	1011	+	1057023	1057129	107	as	1159				HVO_1159
CHR	1012	-	1058692	1060591	1900	is	1160				HVO_1160
CHR	1013	-	1061387	1062003	617	tRNA	1161				HVO_1161
CHR	1014	+	1061440	1061783	344	as	1162				HVO_1162
CHR	1015	+	1062194	1064131	1938	cd	1163	+	2	dRNA-Seq	HVO_1163
CHR	1016	-	1063589	1064971	1383	cd	1165	+	2		HVO_1165
CHR	1017	-	1065312	1065367	56	as	1168				HVO_1168
CHR	1018	+	1065319	1067711	2393	cd	1168	+	2		HVO_1168
CHR	1019	-	1067279	1067517	239	as	1169				HVO_1169
CHR	1020	-	1067577	1068826	1250	cd	1170		2	dRNA-Seq	HVO_1170
CHR	1021	-	1068850	1069898	1049	cd	1172			dRNA-Seq	HVO_1172
CHR	1022	+	1069020	1069310	291	as	1172				HVO_1172
CHR	1023	+	1070083	1072689	2607	cd	1173		4		HVO_1173
CHR	1024	-	1070419	1070563	145	as	1173				HVO_1173
CHR	1025	-	1070696	1070853	158	as	1174				HVO_1174
CHR	1026	+	1072706	1074981	2276	cd	1177		2	dRNA-Seq	HVO_1177
CHR	1027	-	1073141	1073504	364	cd	1178			dRNA-Seq	HVO_1178
CHR	1028	-	1074783	1075263	481	cd	1180			dRNA-Seq	HVO_1180
CHR	1029	+	1075341	1077256	1916	cd	1181	+	2	dRNA-Seq	HVO_1181
CHR	1030	-	1076356	1077699	1344	cd	1183	+			HVO_1183
CHR	1031	-	1077743	1078887	1145	cd	1184				HVO_1184
CHR	1032	+	1078480	1078763	284	as	1184				HVO_1184
CHR	1033	+	1079124	1081510	2387	cd	1185	+	5		HVO_1185
CHR	1034	-	1079676	1079743	68	as	1187				HVO_1187
CHR	1035	-	1080471	1082407	1937	cd	1189	+		dRNA-Seq	HVO_1189
CHR	1036	+	1082552	1083689	1138	cd	1190	+		dRNA-Seq	HVO_1190
CHR	1037	-	1082906	1084123	1218	cd	1191	+		dRNA-Seq	HVO_1191
CHR	1038	+	1084317	1086132	1816	cd	1192		2		HVO_1192
CHR	1039	-	1087302	1087921	620	as	1195				HVO_1195
CHR	1040	+	1087544	1087863	320	is	1195				HVO_1195
CHR	1041	-	1088620	1090128	1509	cd	1197	+	2	dRNA-Seq	HVO_1197
CHR	1042	+	1090328	1091678	1351	cd	1199	+		dRNA-Seq	HVO_1199
CHR	1043	-	1090406	1090566	161	as	1199				HVO_1199
CHR	1044	-	1091331	1091931	601	cd	1200				HVO_1200
CHR	1045	+	1091836	1092098	263	as	1200				HVO_1200
CHR	1046	-	1093374	1093530	157	as	1201				HVO_1201
CHR	1047	+	1093716	1094208	493	is	1201				HVO_1201
CHR	1048	-	1095651	1096308	658	cd	1203				HVO_1203
CHR	1049	-	1097235	1099394	2160	cd	1205		4		HVO_1205
CHR	1050	+	1098373	1098569	197	as	1207				HVO_1207
CHR	1051	+	1099539	1099966	428	cd	1209				HVO_1209
CHR	1052	+	1100118	1101407	1290	cd	1210		2		HVO_1210
CHR	1053	-	1100155	1100257	103	as	1210				HVO_1210
CHR	1054	-	1100980	1101188	209	as	1211				HVO_1211
CHR	1055	-	1101580	1102481	902	cd	1212				HVO_1212
CHR	1056	+	1102874	1103115	242	is	1213				HVO_1213
CHR	1057	-	1104520	1104631	112	as	1214				HVO_1214
CHR	1058	-	1104826	1105017	192	as	1215				HVO_1215
CHR	1059	-	1105197	1105284	88	as	1216				HVO_1216
CHR	1060	-	1105688	1106028	341	as	1217				HVO_1217
CHR	1061	+	1105839	1106527	689	is	1217				HVO_1217
CHR	1062	-	1108090	1108217	128	as	1218				HVO_1218
CHR	1063	+	1110173	1110333	161	is	1219				HVO_1219
CHR	1064	-	1110348	1110512	165	as	1220				HVO_1220
CHR	1065	-	1111839	1112375	537	is	1222				HVO_1222
CHR	1066	+	1112114	1112291	178	as	1222				HVO_1222
CHR	1067	+	1112692	1113263	572	as	1223				HVO_1223
CHR	1068	-	1112801	1114766	1966	is	1223				HVO_1223
CHR	1069	+	1113338	1113595	258	as	1223				HVO_1223
CHR	1070	+	1116165	1116656	492	cd	1225				HVO_1225
CHR	1071	-	1116184	1116385	202	as	1225				HVO_1225
CHR	1072	+	1117289	1118929	1641	cd	1227				HVO_1227
CHR	1073	-	1118757	1118893	137	as	1227				HVO_1227
CHR	1074	+	1118986	1122555	3570	cd	1228			dRNA-Seq	HVO_1228
CHR	1075	-	1121405	1121607	203	cd	1229			dRNA-Seq	HVO_1229
CHR	1076	-	1122022	1122835	814	cd	1230		2	dRNA-Seq	HVO_1230
CHR	1077	+	1122566	1122846	281	as	1230				HVO_1230
CHR	1078	+	1122982	1124454	1473	cd	1231	+	3		HVO_1231
CHR	1079	-	1124000	1124086	87	as	1232				HVO_1232
CHR	1080	-	1124203	1124412	210	as	1233				HVO_1233
CHR	1081	+	1124527	1124828	302	as	1234				HVO_1234
CHR	1082	-	1124534	1126838	2305	cd	1234		2	dRNA-Seq	HVO_1234
CHR	1083	+	1124864	1125147	284	as	1234				HVO_1234
CHR	1084	-	1126890	1128337	1448	cd	1236				HVO_1236
CHR	1085	+	1129784	1130847	1064	cd	1238			dRNA-Seq	HVO_1238
CHR	1086	+	1131000	1131077	78	ig	1238s1				HVO_1238s1
CHR	1087	-	1131213	1134220	3008	cd	1239		3	dRNA-Seq	HVO_1239
CHR	1088	+	1131218	1131295	78	ig	1238s2				HVO_1238s2
CHR	1089	-	1134279	1134399	121	ig	1241s				HVO_1241s
CHR	1090	+	1134500	1135745	1246	cd	1242			dRNA-Seq	HVO_1242
CHR	1091	-	1135196	1135216	21	as	1242				HVO_1242
CHR	1092	-	1135478	1137797	2320	cd	1243		4		HVO_1243
CHR	1093	+	1138062	1138655	594	cd	1246				HVO_1246
CHR	1094	-	1138249	1138997	749	cd	1247			dRNA-Seq	HVO_1247
CHR	1095	+	1138819	1138904	86	as	1247				HVO_1247
CHR	1096	+	1139026	1139134	109	ig	1247s				HVO_1247s
CHR	1097	-	1139125	1139433	309	as	1248				HVO_1248
CHR	1098	+	1139176	1140850	1675	cd	1248	+	2	dRNA-Seq	HVO_1248
CHR	1099	-	1139546	1141044	1499	cd	1250		2	dRNA-Seq	HVO_1250
CHR	1100	+	1140883	1140966	84	as	1251				HVO_1251
CHR	1101	+	1141160	1142264	1105	cd	1252			dRNA-Seq	HVO_1252
CHR	1102	-	1141340	1141835	496	cd	1253				HVO_1253
CHR	1103	+	1142411	1142464	54	as	1255				HVO_1255
CHR	1104	-	1142679	1143326	648	is	1255				HVO_1255
CHR	1105	-	1143728	1149017	5290	cd	1256		5		HVO_1256
CHR	1106	+	1145715	1145848	134	as	1258				HVO_1258
CHR	1107	-	1149773	1151187	1415	cd	1259				HVO_1259
CHR	1108	+	1151541	1151592	52	is	1262				HVO_1262
CHR	1109	-	1152907	1154216	1310	cd	1263		2		HVO_1263
CHR	1110	+	1154327	1156028	1702	cd	1265		2	dRNA-Seq	HVO_1265
CHR	1111	-	1155927	1156218	292	as	1267				HVO_1267
CHR	1112	+	1156067	1158952	2886	cd	1267		4		HVO_1267
CHR	1113	-	1158228	1158280	53	as	1269				HVO_1269
CHR	1114	-	1159238	1159671	434	cd	1270				HVO_1270
CHR	1115	-	1159802	1161721	1920	cd	1271		2		HVO_1271
CHR	1116	+	1160679	1160800	122	as	1272				HVO_1272
CHR	1117	-	1161811	1163360	1550	cd	1273			dRNA-Seq	HVO_1273
CHR	1118	-	1163409	1163516	108	ig	1273s1				HVO_1273s1
CHR	1119	-	1163567	1163692	126	ig	1273s2				HVO_1273s2
CHR	1120	+	1163774	1166098	2325	cd	1273_A		5		HVO_1273_A
CHR	1121	-	1164982	1165510	529	as	1275				HVO_1275
CHR		+	1165455	1165683	229	cd	1276				HVO_1276
CHR		+	1165739	1165916	178	tRNA + CD box	1276_T				HVO_1276_T
CHR	1122	+	1166185	1166632	448	cd	1278			dRNA-Seq	HVO_1278
CHR	1123	+	1166658	1168070	1413	cd	1279		2		HVO_1279
CHR	1124	-	1168659	1172176	3518	cd	1281		5		HVO_1281
CHR	1125	+	1171342	1171478	137	as	1284				HVO_1284
CHR	1126	+	1172260	1174303	2044	cd	1286		3		HVO_1286
CHR	1127	-	1172580	1172632	53	as	1286				HVO_1286
CHR	1128	-	1173828	1175293	1466	cd	1289		2		HVO_1289
CHR	1129	+	1174334	1174648	315	as	1289				HVO_1289
CHR	1130	-	1175331	1175477	147	ig	1290s				HVO_1290s
CHR	1131	+	1175621	1176489	869	cd	1291			dRNA-Seq	HVO_1291
CHR	1132	+	1177037	1179087	2051	cd	1294				HVO_1294
CHR	1133	-	1177712	1177755	44	as	1294				HVO_1294
CHR	1134	+	1179113	1181341	2229	cd	1295		3	dRNA-Seq	HVO_1295
CHR	1135	+	1181546	1181665	120	ig	1297s				HVO_1297s
CHR	1136	+	1182194	1183225	1032	is	1298				HVO_1298
CHR	1137	-	1183153	1183256	104	as	1298				HVO_1298
CHR	1138	+	1183313	1184837	1525	cd	1299		2	dRNA-Seq	HVO_1299
CHR	1139	-	1183744	1183915	172	as	1299				HVO_1299
CHR	1140	-	1184618	1191318	6701	cd	1301		5		HVO_1301
CHR	1141	+	1185364	1185503	140	as	1301				HVO_1301
CHR	1142	+	1189247	1189358	112	as	1304				HVO_1304
CHR	1143	+	1189787	1189895	109	as	1305				HVO_1305
CHR	1144	+	1190599	1190691	93	as	1305				HVO_1305
CHR	1145	-	1191341	1192639	1299	cd	1306				HVO_1306
CHR	1146	+	1192864	1193390	527	cd	1307				HVO_1307
CHR	1147	-	1193251	1193346	96	as	1307				HVO_1307
CHR	1148	-	1193523	1194933	1411	cd	1308			dRNA-Seq	HVO_1308
CHR	1149	+	1193540	1193757	218	as	1308				HVO_1308
CHR	1150	+	1193886	1194020	135	as	1308				HVO_1308
CHR	1151	+	1195098	1196999	1902	cd	1309	+		dRNA-Seq	HVO_1309
CHR	1152	-	1196041	1196129	89	as	1309				HVO_1309
CHR	1153	-	1196259	1198005	1747	cd	1310	+	2	dRNA-Seq	HVO_1310
CHR	1154	+	1198412	1198615	204	is	1312				HVO_1312
CHR	1155	+	1199068	1200289	1222	cd	1313				HVO_1313
CHR	1156	+	1200621	1201916	1296	cd	1314				HVO_1314
CHR	1157	-	1201504	1201534	31	as	1316				HVO_1316
CHR	1158	-	1201677	1202141	465	cd	1317			dRNA-Seq	HVO_1317
CHR	1159	+	1202251	1202867	617	cd	1318			dRNA-Seq	HVO_1318
CHR	1160	-	1203082	1203531	450	cd	1319				HVO_1319
CHR	1161	-	1204124	1205626	1503	cd	1322		2		HVO_1322
CHR	1162	+	1204382	1204578	197	ig	1320s				HVO_1320s
CHR	1163	+	1205793	1206331	539	cd	1324			dRNA-Seq	HVO_1324
CHR	1164	-	1205819	1206297	479	as	1324				HVO_1324
CHR	1165	-	1206416	1206616	201	cd	1326			dRNA-Seq	HVO_1326
CHR	1166	+	1206529	1206600	72	ig	1325s				HVO_1325s
CHR	1167	+	1206929	1209847	2919	cd	1327				HVO_1327
CHR	1168	-	1210671	1210793	123	is	1330				HVO_1330
CHR	1169	+	1210938	1211960	1023	cd	1331	+	2	dRNA-Seq	HVO_1331
CHR	1170	-	1211620	1214665	3046	cd	1333	+		dRNA-Seq	HVO_1333
CHR	1171	+	1214912	1215529	618	cd	1334				HVO_1334
CHR	1172	-	1215019	1219298	4280	cd	1336	+	3		HVO_1336
CHR	1173	-	1219340	1220953	1614	cd	1340				HVO_1340
CHR	1174	+	1219414	1219880	467	cd	1339			dRNA-Seq	HVO_1339
CHR	1175	+	1221033	1223592	2560	cd	1341		3		HVO_1341
CHR	1176	-	1221695	1222668	974	cd	1343			dRNA-Seq	HVO_1343
CHR	1177	-	1223032	1223820	789	cd	1345	+		dRNA-Seq	HVO_1345
CHR	1178	+	1223723	1223850	128	ig	1344s				HVO_1344s
CHR	1179	+	1223881	1225731	1851	cd	1346				HVO_1346
CHR	1180	-	1225126	1225919	794	cd	1347				HVO_1347
CHR	1181	-	1226202	1227188	987	cd	1348			dRNA-Seq	HVO_1348
CHR	1182	+	1228483	1228674	192	is	1349				HVO_1349
CHR	1183	+	1228722	1231576	2855	cd	1350	+	2	dRNA-Seq	HVO_1350
CHR	1184	-	1230981	1231007	27	as	1351				HVO_1351
CHR	1185	-	1231032	1231881	850	cd	1352	+			HVO_1352
CHR	1186	+	1231687	1231712	26	as	1352				HVO_1352
CHR	1187	-	1232023	1232249	227	as	1353				HVO_1353
CHR	1188	+	1232030	1232354	325	cd	1353			dRNA-Seq	HVO_1353
CHR	1189	+	1232451	1232631	181	as	1354				HVO_1354
CHR	1190	-	1232498	1234711	2214	cd	1354		3		HVO_1354
CHR	1191	+	1232725	1232853	129	as	1354				HVO_1354
CHR	1192	+	1234606	1234707	102	ig	1355s				HVO_1355s
CHR	1193	+	1234836	1236633	1798	cd	1356				HVO_1356
CHR	1194	-	1235893	1235933	41	as	1356				HVO_1356
CHR	1195	-	1236285	1237291	1007	as	1357				HVO_1357
CHR	1196	+	1236662	1238568	1907	cd	1357	+		dRNA-Seq	HVO_1357
CHR	1197	-	1237451	1238077	627	as	1357				HVO_1357
CHR	1198	-	1238095	1239630	1536	cd	1358	+	3		HVO_1358
CHR	1199	-	1240196	1240410	215	is	1361				HVO_1361
CHR	1200	-	1241467	1241613	147	is	1363				HVO_1363
CHR	1201	-	1242224	1243532	1309	cd	1365				HVO_1365
CHR	1202	-	1244390	1244705	316	ig	1367s				HVO_1367s
CHR	1203	-	1244777	1245750	974	cd	1368			dRNA-Seq	HVO_1368
CHR	1204	+	1245770	1246363	594	as	1369				HVO_1369
CHR	1205	-	1245780	1252610	6831	cd	1369		6		HVO_1369
CHR	1206	+	1247678	1247776	99	as	1370				HVO_1370
CHR	1207	+	1250356	1250399	44	as	1373				HVO_1373
CHR	1208	-	1252646	1254401	1756	cd	1375				HVO_1375
CHR	1209	-	1254580	1255022	443	cd	1376			dRNA-Seq	HVO_1376
CHR	1210	+	1255102	1256005	904	cd	1377	+	2	dRNA-Seq	HVO_1377
CHR	1211	-	1255809	1256399	591	cd	1379				HVO_1379
CHR	1212	+	1256104	1256418	315	as	1379				HVO_1379
CHR	1213	-	1256480	1258200	1721	cd	1380			dRNA-Seq	HVO_1380
CHR	1214	+	1256615	1256789	175	as	1380				HVO_1380
CHR	1215	+	1258397	1258894	498	is	1381				HVO_1381
CHR	1216	+	1259091	1260359	1269	cd	1382		2	dRNA-Seq	HVO_1382
CHR	1217	-	1260181	1262528	2348	cd	1384		4		HVO_1384
CHR	1218	+	1261066	1261181	116	as	1385				HVO_1385
CHR	1219	-	1262563	1264591	2029	cd	1389	+	2	dRNA-Seq	HVO_1389
CHR	1220	+	1262647	1263203	557	cd	1388	+		dRNA-Seq	HVO_1388
CHR	1221	-	1264911	1265387	477	cd	1391			dRNA-Seq	HVO_1391
CHR	1222	+	1265553	1266231	679	cd	1392	+		dRNA-Seq	HVO_1392
CHR	1223	-	1265674	1267753	2080	cd	1393	+	2		HVO_1393
CHR	1224	+	1266241	1266267	27	as	1393				HVO_1393
CHR	1225	+	1267898	1270635	2738	cd	1395	+	2	dRNA-Seq	HVO_1395
CHR	1226	-	1269133	1269221	89	as	1397				HVO_1397
CHR	1227	-	1270410	1271877	1468	cd	1396			dRNA-Seq	HVO_1396
CHR	1228	+	1271260	1271402	143	as	1396				HVO_1396
CHR	1229	-	1272012	1278614	6603	cd	1398		5		HVO_1398
CHR	1230	+	1274827	1274877	51	as	1400				HVO_1400
CHR	1231	+	1275543	1275835	293	as	1400				HVO_1400
CHR	1232	+	1277161	1277220	60	as	1401				HVO_1401
CHR	1233	+	1279059	1279554	496	cd	1403			dRNA-Seq	HVO_1403
CHR	1234	-	1279205	1280075	871	cd	1405			dRNA-Seq	HVO_1405
CHR	1235	+	1279697	1279956	260	as	1405				HVO_1405
CHR	1236	-	1280159	1280330	172	ig	1405s				HVO_1405s
CHR	1237	+	1280249	1280313	65	as	1405s				HVO_1405s
CHR	1238	-	1280837	1280888	52	is	1406				HVO_1406
CHR	1239	-	1281272	1282025	754	cd	1407			dRNA-Seq	HVO_1407
CHR	1240	-	1282056	1282196	141	ig	1407s1				HVO_1407s1
CHR	1241	+	1282103	1282264	162	ig	1407s2				HVO_1407s2
CHR	1242	+	1282347	1282817	471	cd	1408				HVO_1408
CHR	1243	-	1282540	1282649	110	as	1408				HVO_1408
CHR	1244	+	1283390	1283537	148	is	1409				HVO_1409
CHR	1245	+	1284841	1285198	358	ig	1411s				HVO_1411s
CHR	1246	+	1285323	1286216	894	cd	1412				HVO_1412
CHR	1247	+	1286370	1287553	1184	cd	1413				HVO_1413
CHR	1248	+	1287591	1289283	1693	cd	1414			dRNA-Seq	HVO_1414
CHR	1249	+	1289472	1290138	667	cd	1415				HVO_1415
CHR	1250	+	1290594	1291719	1126	cd	1416			dRNA-Seq	HVO_1416
CHR	1251	-	1291434	1291475	42	ig	1418s1				HVO_1418s1
CHR	1252	-	1291540	1291724	185	ig	1418s2				HVO_1418s2
CHR	1253	-	1291764	1293076	1313	cd	1417				HVO_1417
CHR	1254	+	1291785	1292861	1077	as	1417				HVO_1417
CHR	1255	+	1293362	1295178	1817	cd	1419	+	3	dRNA-Seq	HVO_1419
CHR	1256	-	1295047	1296407	1361	cd	1422	+	2		HVO_1422
CHR	1257	+	1295360	1295427	68	as	1422				HVO_1422
CHR	1258	+	1296165	1296304	140	ig	1422s				HVO_1422s
CHR	1259	+	1296646	1296964	319	cd	1423			dRNA-Seq	HVO_1423
CHR	1260	-	1296886	1297000	115	as	1424				HVO_1424
CHR	1261	+	1297036	1298473	1438	cd	1424	+		dRNA-Seq	HVO_1424
CHR	1262	-	1297581	1297737	157	as	1424				HVO_1424
CHR	1263	-	1297922	1299020	1099	cd	1425	+			HVO_1425
CHR	1264	+	1299145	1299946	802	as	1426				HVO_1426
CHR	1265	-	1299378	1299445	68	is	1426				HVO_1426
CHR	1266	+	1299960	1299982	23	as	1426				HVO_1426
CHR	1267	+	1300170	1300236	67	as	1426				HVO_1426
CHR	1268	-	1302256	1302406	151	cd	1430				HVO_1430
CHR	1269	-	1302462	1303603	1142	is	1431				HVO_1431
CHR	1270	+	1303802	1303936	135	as	1431				HVO_1431
CHR	1271	-	1304068	1304845	778	cd	1432		2		HVO_1432
CHR	1272	-	1304931	1307274	2344	cd	1434				HVO_1434
CHR	1273	-	1307322	1307554	233	ig	1434s				HVO_1434s
CHR	1274	+	1308129	1309378	1250	cd	1437				HVO_1437
CHR	1275	-	1309054	1309092	39	as	1437				HVO_1437
CHR	1276	-	1309358	1309391	34	as	1437				HVO_1437
CHR	1277	-	1309397	1309505	109	as	1438				HVO_1438
CHR	1278	+	1309399	1309972	574	cd	1438				HVO_1438
CHR	1279	-	1309528	1309666	139	as	1438				HVO_1438
CHR	1280	-	1309710	1310851	1142	cd	1439	+		dRNA-Seq	HVO_1439
CHR	1281	+	1310059	1310256	198	as	1439				HVO_1439
CHR	1282	-	1311013	1314116	3104	cd	1440		3	dRNA-Seq	HVO_1440
CHR	1283	-	1314636	1316376	1741	cd	1443		2	dRNA-Seq	HVO_1443
CHR	1284	+	1316606	1317532	927	cd	1445			dRNA-Seq	HVO_1445
CHR	1285	+	1317657	1318730	1074	cd	1446				HVO_1446
CHR	1286	+	1318935	1320757	1823	cd	1447				HVO_1447
CHR	1287	-	1321709	1322114	406	cd	1450			dRNA-Seq	HVO_1450
CHR	1288	+	1322263	1324563	2301	cd	1451		2		HVO_1451
CHR	1289	+	1324690	1327740	3051	cd	1453		3	dRNA-Seq	HVO_1453
CHR	1290	-	1325852	1325913	62	as	1453				HVO_1453
CHR	1291	-	1327578	1328621	1044	is	1456				HVO_1456
CHR	1292	+	1327746	1327777	32	as	1456				HVO_1456
CHR	1293	+	1329313	1330363	1051	cd	1457			dRNA-Seq	HVO_1457
CHR	1294	-	1329637	1329727	91	as	1457				HVO_1457
CHR	1295	-	1329982	1330331	350	as	1457				HVO_1457
CHR	1296	-	1330431	1331558	1128	cd	1458	+	2	dRNA-Seq	HVO_1458
CHR	1297	+	1330483	1330983	501	as	1459				HVO_1459
CHR	1298	-	1333325	1334407	1083	cd	1462				HVO_1462
CHR	1299	-	1334467	1336665	2199	cd	1463		2		HVO_1463
CHR	1300	-	1336672	1337705	1034	cd	1465			dRNA-Seq	HVO_1465
CHR	1301	+	1337998	1338292	295	is	1466				HVO_1466
CHR	1302	+	1338354	1339849	1496	cd	1467	+			HVO_1467
CHR	1303	-	1338804	1339363	560	cd	1468	+		dRNA-Seq	HVO_1468
CHR	1304	-	1339409	1343393	3985	cd	1469		3		HVO_1469
CHR	1305	+	1343588	1345938	2351	cd	1472		3	dRNA-Seq	HVO_1472
CHR	1306	-	1343634	1343772	139	as	1472				HVO_1472
CHR	1307	-	1345809	1345918	110	ig	1474s				HVO_1474s
CHR	1308	-	1346020	1346620	601	cd	1475				HVO_1475
CHR	1309	-	1346841	1347006	166	is	1476				HVO_1476
CHR	1310	-	1347156	1348324	1169	cd	1477			dRNA-Seq	HVO_1477
CHR	1311	+	1347175	1347384	210	as	1477				HVO_1477
CHR	1312	+	1347405	1347581	177	as	1477				HVO_1477
CHR	1313	+	1348398	1349466	1069	cd	1478			dRNA-Seq	HVO_1478
CHR	1314	-	1349223	1350259	1037	is	1479				HVO_1479
CHR	1315	+	1349602	1349837	236	as	1479				HVO_1479
CHR	1316	+	1351175	1352445	1271	cd	1481		2	dRNA-Seq	HVO_1481
CHR	1317	-	1351299	1351336	38	as	1480				HVO_1480
CHR	1318	-	1352057	1352307	251	as	1482				HVO_1482
CHR	1319	+	1352495	1352630	136	as	1483				HVO_1483
CHR	1320	-	1352507	1352957	451	is	1483				HVO_1483
CHR	1321	-	1354647	1354696	50	is	1484				HVO_1484
CHR	1322	+	1355290	1355909	620	cd	1485			dRNA-Seq	HVO_1485
CHR	1323	+	1356046	1356588	543	cd	1486			dRNA-Seq	HVO_1486
CHR	1324	+	1357204	1357318	115	is	1487				HVO_1487
CHR	1325	-	1357787	1359233	1447	cd	1488			dRNA-Seq	HVO_1488
CHR	1326	-	1359253	1359521	269	is	1489				HVO_1489
CHR	1327	-	1360067	1360220	154	as	1490				HVO_1490
CHR	1328	-	1360361	1361997	1637	cd	1491			dRNA-Seq	HVO_1491
CHR	1329	+	1361380	1361608	229	as	1491				HVO_1491
CHR	1330	-	1362095	1362326	232	as	1492				HVO_1492
CHR	1331	+	1362167	1363083	917	cd	1492	+		dRNA-Seq	HVO_1492
CHR	1332	-	1362454	1370102	7649	cd	1493	+	9	dRNA-Seq	HVO_1493
CHR	1333	-	1370207	1378615	8409	cd	1502		9		HVO_1502
CHR	1334	+	1373538	1373588	51	as	1505				HVO_1505
CHR	1335	+	1376988	1377064	77	as	1508				HVO_1508
CHR	1336	+	1377331	1377447	117	as	1510				HVO_1510
CHR	1337	+	1377508	1377803	296	as	1510				HVO_1510
CHR	1338	+	1378001	1378507	507	as	1510				HVO_1510
CHR	1339	+	1378865	1378953	89	ig	1510s				HVO_1510s
CHR	1340	+	1378994	1380408	1415	cd	1512		3	dRNA-Seq	HVO_1512
CHR	1341	-	1380146	1380206	61	as	1514				HVO_1514
CHR	1342	-	1380213	1380318	106	as	1514				HVO_1514
CHR	1343	-	1380659	1382303	1645	cd	1515			dRNA-Seq	HVO_1515
CHR	1344	+	1380718	1381664	947	cd	1516			dRNA-Seq	HVO_1516
CHR	1345	+	1381670	1381822	153	as	1517				HVO_1517
CHR	1346	-	1382345	1382586	242	ig	1517s				HVO_1517s
CHR	1347	+	1382661	1384119	1459	cd	1518		2	dRNA-Seq	HVO_1518
CHR	1348	-	1382769	1383043	275	as	1518				HVO_1518
CHR	1349	-	1385343	1389882	4540	cd	1522		4		HVO_1522
CHR	1350	+	1386756	1386895	140	as	1523				HVO_1523
CHR	1351	+	1387083	1387204	122	as	1523				HVO_1523
CHR	1352	+	1387384	1387732	349	as	1523				HVO_1523
CHR	1353	+	1387980	1388190	211	as	1524				HVO_1524
CHR	1354	+	1388391	1388561	171	as	1524				HVO_1524
CHR	1355	+	1388832	1389924	1093	as	1524				HVO_1524
CHR	1356	-	1390191	1391341	1151	cd	1525				HVO_1525
CHR	1357	+	1391322	1391382	61	as	1525				HVO_1525
CHR	1358	-	1391409	1392176	768	as	1526				HVO_1526
CHR	1359	+	1391466	1394856	3391	cd	1526		3	dRNA-Seq	HVO_1526
CHR	1360	-	1392478	1392837	360	as	1526				HVO_1526
CHR	1361	-	1393677	1393851	175	as	1527				HVO_1527
CHR	1362	-	1394194	1395660	1467	cd	1529			dRNA-Seq	HVO_1529
CHR	1363	+	1395742	1399062	3321	cd	1530			dRNA-Seq	HVO_1530
CHR	1364	-	1396369	1396528	160	as	1530				HVO_1530
CHR	1365	-	1398982	1400340	1359	cd	1531				HVO_1531
CHR	1366	+	1400421	1401822	1402	cd	1532				HVO_1532
CHR	1367	-	1401404	1402598	1195	cd	1533		2		HVO_1533
CHR	1368	+	1402644	1403210	567	cd	1535	+			HVO_1535
CHR	1369	-	1402668	1403514	847	cd	1536			dRNA-Seq	HVO_1536
CHR	1370	+	1403302	1403538	237	as	1536				HVO_1536
CHR	1371	-	1403676	1404822	1147	cd	1537			dRNA-Seq	HVO_1537
CHR	1372	+	1404838	1404959	122	ig	1537s				HVO_1537s
CHR	1373	+	1405193	1406785	1593	cd	1558				HVO_1558
CHR	1374	+	1407890	1407960	71	is	1559				HVO_1559
CHR	1375	+	1408205	1409534	1330	cd	1540				HVO_1540
CHR	1376	+	1409834	1413036	3203	cd	1541	+	3	dRNA-Seq	HVO_1541
CHR	1377	-	1412095	1412121	27	as	1542				HVO_1542
CHR	1378	-	1412423	1412482	60	as	1543				HVO_1543
CHR	1379	-	1412807	1418420	5614	cd	1544	+	4		HVO_1544
CHR	1380	+	1414274	1414369	96	as	1546				HVO_1546
CHR	1381	-	1418695	1421059	2365	cd	1548		4	dRNA-Seq	HVO_1548
CHR	1382	-	1421351	1423029	1679	cd	1553				HVO_1553
CHR	1383	+	1423148	1425481	2334	cd	1554	+	2	dRNA-Seq	HVO_1554
CHR	1384	-	1423177	1423354	178	as	1554				HVO_1554
CHR	1385	-	1423384	1423492	109	as	1554				HVO_1554
CHR	1386	-	1423642	1423892	251	as	1554				HVO_1554
CHR	1387	-	1423974	1424091	118	as	1554				HVO_1554
CHR	1388	-	1424157	1425880	1724	cd	1556	+			HVO_1556
CHR	1389	+	1426425	1429036	2612	cd	1557		2		HVO_1557
CHR	1390	-	1428269	1429738	1470	cd	1559		3		HVO_1559
CHR	1391	+	1430020	1430228	209	cd	1561			dRNA-Seq	HVO_1561
CHR	1392	+	1430261	1431431	1171	cd	1562	+		dRNA-Seq	HVO_1562
CHR	1393	-	1430311	1431587	1277	cd	1563	+		dRNA-Seq	HVO_1563
CHR	1394	-	1431850	1433227	1378	cd	1564			dRNA-Seq	HVO_1564
CHR	1395	+	1432572	1432611	40	as	1564				HVO_1564
CHR	1396	+	1433402	1435595	2194	cd	1565		2	dRNA-Seq	HVO_1565
CHR	1397	+	1435657	1437790	2134	cd	1567	+	3	dRNA-Seq	HVO_1567
CHR	1398	-	1435687	1435751	65	as	1567				HVO_1567
CHR	1399	-	1435957	1436107	151	as	1567				HVO_1567
CHR	1400	-	1437251	1441135	3885	cd	1570	+	2		HVO_1570
CHR	1401	+	1438816	1438915	100	as	1570				HVO_1570
CHR	1402	+	1441400	1445932	4533	cd	1572		2		HVO_1572
CHR	1403	-	1443729	1443779	51	as	1573				HVO_1573
CHR	1404	-	1443786	1444059	274	as	1573				HVO_1573
CHR	1405	-	1445820	1445896	77	as	1573				HVO_1573
CHR	1406	+	1446024	1446116	93	ig	1573s1				HVO_1573s1
CHR	1407	+	1446165	1446320	156	ig	1573s2				HVO_1573s2
CHR	1408	+	1446344	1446569	226	as	1574				HVO_1574
CHR	1409	-	1446369	1448807	2439	cd	1574		3		HVO_1574
CHR	1410	+	1446616	1446802	187	as	1574				HVO_1574
CHR	1411	+	1448372	1448478	107	as	1576				HVO_1576
CHR	1412	+	1448994	1449989	996	cd	1577			dRNA-Seq	HVO_1577
CHR	1413	-	1449690	1453514	3825	cd	1578		4	dRNA-Seq	HVO_1578
CHR	1414	+	1450086	1450536	451	as	1578				HVO_1578
CHR	1415	+	1450578	1450613	36	as	1578				HVO_1578
CHR	1416	+	1450629	1450817	189	as	1578				HVO_1578
CHR	1417	-	1453659	1454055	397	as	1582				HVO_1582
CHR	1418	+	1453676	1454002	327	cd	1582				HVO_1582
CHR	1419	+	1454101	1454408	308	cd	1583			dRNA-Seq	HVO_1583
CHR	1420	-	1454135	1454868	734	cd	1584			dRNA-Seq	HVO_1584
CHR	1421	+	1454784	1454819	36	as	1584				HVO_1584
CHR	1422	+	1455022	1457059	2038	cd	1585				HVO_1585
CHR	1423	-	1456123	1456256	134	as	1585				HVO_1585
CHR	1424	+	1457141	1457195	55	as	1586				HVO_1586
CHR	1425	-	1458163	1458300	138	is	1586				HVO_1586
CHR	1426	-	1458635	1462979	4345	cd	1587		4		HVO_1587
CHR	1427	-	1463194	1465522	2329	cd	1591		3	dRNA-Seq	HVO_1591
CHR	1428	+	1465725	1467268	1544	cd	1594	+	2		HVO_1594
CHR	1429	-	1466826	1468339	1514	is	1596	+			HVO_1596
CHR	1430	+	1468927	1469322	396	cd	1597			dRNA-Seq	HVO_1597
CHR	1431	-	1469074	1470310	1237	cd	1598			dRNA-Seq	HVO_1598
CHR	1432	+	1469538	1469660	123	as	1598				HVO_1598
CHR	1433	-	1470697	1474127	3431	cd	1600	+	4		HVO_1600
CHR	1434	+	1470787	1471221	435	cd	1599	+			HVO_1599
CHR	1435	+	1473338	1473372	35	as	1603				HVO_1603
CHR	1436	+	1473816	1474006	191	as	1603				HVO_1603
CHR	1437	+	1474413	1477280	2868	cd	1604		2		HVO_1604
CHR	1438	-	1475337	1475575	239	as	1604				HVO_1604
CHR	1439	-	1475628	1475712	85	as	1605				HVO_1605
CHR	1440	-	1475744	1476397	654	as	1605				HVO_1605
CHR	1441	-	1476661	1477027	367	as	1605				HVO_1605
CHR	1442	-	1477094	1477682	589	cd	1606	+			HVO_1606
CHR	1443	+	1477735	1478110	376	cd	1607				HVO_1607
CHR	1444	-	1478184	1480170	1987	is	1608				HVO_1608
CHR	1445	+	1478364	1478520	157	as	1608				HVO_1608
CHR	1446	-	1480364	1481297	934	cd	1610			dRNA-Seq	HVO_1610
CHR	1447	+	1480403	1480560	158	as	1610				HVO_1610
CHR	1448	+	1480586	1481052	467	as	1610				HVO_1610
CHR	1449	+	1481261	1481407	147	ig	1610s1				HVO_1610s1
CHR	1450	-	1481323	1481354	32	ig	1610s2				HVO_1610s2
CHR	1451	+	1481415	1481716	302	cd	1611				HVO_1611
CHR	1452	-	1481550	1483299	1750	cd	1612		3		HVO_1612
CHR	1453	+	1482260	1482374	115	as	1613				HVO_1613
CHR	1454	-	1483538	1484266	729	is	1615				HVO_1615
CHR	1455	+	1484433	1485818	1386	cd	1616		3	dRNA-Seq	HVO_1616
CHR	1456	-	1485648	1485806	159	ig	1618s1				HVO_1618s1
CHR	1457	+	1486023	1486048	26	ig	1618s2				HVO_1618s2
CHR	1458	+	1486134	1486389	256	ig	1618s3				HVO_1618s3
CHR	1459	+	1486505	1488067	1563	cd	1619		2	dRNA-Seq	HVO_1619
CHR	1460	+	1488076	1488187	112	as	1621				HVO_1621
CHR	1461	-	1488090	1488510	421	cd	1621			dRNA-Seq	HVO_1621
CHR	1462	+	1488642	1488667	26	is	1622				HVO_1622
CHR	1463	-	1490079	1491193	1115	cd	1623			dRNA-Seq	HVO_1623
CHR	1464	-	1491320	1494168	2849	cd	1625		2	dRNA-Seq	HVO_1625
CHR	1465	+	1492816	1492867	52	as	1625				HVO_1625
CHR	1466	+	1493061	1493192	132	as	1625				HVO_1625
CHR	1467	+	1494393	1494541	149	cd	1627				HVO_1627
CHR	1468	+	1494975	1495040	66	is	1628				HVO_1628
CHR	1469	-	1495311	1496726	1416	cd	1629				HVO_1629
CHR	1470	-	1496952	1498481	1530	cd	1631			dRNA-Seq	HVO_1631
CHR	1471	+	1498669	1499094	426	cd	1632			dRNA-Seq	HVO_1632
CHR	1472	+	1499341	1500062	722	cd	1633			dRNA-Seq	HVO_1633
CHR	1473	-	1499513	1499587	75	as	1633				HVO_1633
CHR	1474	+	1500493	1501164	672	cd	1635	+		dRNA-Seq	HVO_1635
CHR	1475	-	1500898	1502509	1612	cd	1636	+	2	dRNA-Seq	HVO_1636
CHR	1476	+	1501232	1501366	135	as	1636				HVO_1636
CHR	1477	+	1501514	1501615	102	as	1637				HVO_1637
CHR	1478	+	1501725	1501851	127	as	1637				HVO_1637
CHR	1479	+	1502579	1503233	655	cd	1638		2		HVO_1638
CHR	1480	+	1503448	1503966	519	is	1640				HVO_1640
CHR	1481	-	1504602	1505146	545	ig	1640s				HVO_1640s
CHR	1482	-	1505419	1505929	511	is	1642				HVO_1642
CHR	1483	-	1506421	1506591	171	is	1644				HVO_1644
CHR	1484	+	1506668	1506800	133	as	1645				HVO_1645
CHR	1485	+	1506897	1507032	136	as	1645				HVO_1645
CHR	1486	+	1507068	1507184	117	as	1645				HVO_1645
CHR	1487	+	1508246	1508558	313	as	1645				HVO_1645
CHR	1488	-	1508455	1510017	1563	cd	1646				HVO_1646
CHR	1489	-	1510228	1510729	502	cd	1647			dRNA-Seq	HVO_1647
CHR	1490	+	1510529	1510673	145	as	1647				HVO_1647
CHR	1491	+	1510888	1512839	1952	cd	1648	+	2	dRNA-Seq	HVO_1648
CHR	1492	-	1512551	1512601	51	as	1649				HVO_1649
CHR	1493	-	1512784	1515388	2605	cd	1650	+			HVO_1650
CHR	1494	+	1515523	1516611	1089	cd	1651			dRNA-Seq	HVO_1651
CHR	1495	+	1517028	1517797	770	cd	1653	+			HVO_1653
CHR	1496	-	1517155	1518635	1481	cd	1654	+			HVO_1654
CHR	1497	+	1517909	1518089	181	as	1654				HVO_1654
CHR	1498	+	1518160	1518463	304	as	1654				HVO_1654
CHR	1499	+	1518796	1519306	511	cd	1655			dRNA-Seq	HVO_1655
CHR	1500	-	1519055	1521300	2246	cd	1656			dRNA-Seq	HVO_1656
CHR	1501	+	1519332	1519368	37	as	1656				HVO_1656
CHR	1502	+	1521540	1523653	2114	cd	1657	+	2		HVO_1657
CHR	1503	-	1522305	1522442	138	as	1657				HVO_1657
CHR	1504	-	1523137	1523198	62	as	1658				HVO_1658
CHR	1505	-	1523393	1525228	1836	cd	1659	+	2		HVO_1659
CHR	1506	+	1523879	1524019	141	as	1659				HVO_1659
CHR	1507	-	1525265	1525704	440	cd	1661				HVO_1661
CHR	1508	+	1525645	1525738	94	as	1661				HVO_1661
CHR	1509	-	1525908	1526366	459	tRNA	1663				HVO_1663
CHR	1510	+	1525919	1526382	464	cd	1662			dRNA-Seq	HVO_1662
CHR	1511	+	1526471	1527020	550	cd	1664			dRNA-Seq	HVO_1664
CHR	1512	-	1526687	1528090	1404	cd	1665	+	3	dRNA-Seq	HVO_1665
CHR	1513	+	1527071	1527544	474	as	1666				HVO_1666
CHR	1514	-	1528118	1529926	1809	cd	1668		2	dRNA-Seq	HVO_1668
CHR	1515	+	1528152	1528315	164	as	1668				HVO_1668
CHR	1516	-	1530097	1530331	235	is	1670				HVO_1670
CHR	1517	+	1531064	1531913	850	cd	1671		2		HVO_1671
CHR	1518	+	1532090	1534058	1969	cd	1673		3	dRNA-Seq	HVO_1673
CHR	1519	-	1532161	1532186	26	as	1673				HVO_1673
CHR	1520	+	1534074	1535599	1526	cd	1676	+	2	dRNA-Seq	HVO_1676
CHR	1521	-	1535060	1535876	817	cd	1678	+		dRNA-Seq	HVO_1678
CHR	1522	+	1535631	1535983	353	as	1678				HVO_1678
CHR	1523	+	1536012	1536787	776	cd	1679	+		dRNA-Seq	HVO_1679
CHR	1524	-	1536030	1537928	1899	cd	1680	+	2	dRNA-Seq	HVO_1680
CHR	1525	+	1536836	1536988	153	as	1680				HVO_1680
CHR	1526	+	1537118	1537257	140	as	1681				HVO_1681
CHR	1527	-	1538283	1538437	155	is	1682				HVO_1682
CHR	1528	-	1538862	1540329	1468	cd	1683			dRNA-Seq	HVO_1683
CHR	1529	+	1540603	1542688	2086	cd	1684			dRNA-Seq	HVO_1684
CHR	1530	-	1542334	1543990	1657	cd	1685			dRNA-Seq	HVO_1685
CHR	1531	-	1544220	1545410	1191	cd	1686				HVO_1686
CHR	1532	+	1545564	1548359	2796	cd	1690			dRNA-Seq	HVO_1690
CHR	1533	-	1545626	1545746	121	as	1687				HVO_1687
CHR	1534	-	1545815	1546218	404	cd	1688		2		HVO_1688
CHR	1535	-	1547599	1550978	3380	cd	1691	+	3	dRNA-Seq	HVO_1691
CHR	1536	+	1549973	1550071	99	as	1692				HVO_1692
CHR	1537	-	1551250	1553675	2426	cd	1694		2		HVO_1694
CHR	1538	+	1553998	1559013	5016	cd	1696		2		HVO_1696
CHR	1539	-	1555359	1555480	122	as	1696				HVO_1696
CHR	1540	-	1558554	1558962	409	as	1697				HVO_1697
CHR	1541	+	1559148	1560144	997	cd	1698			dRNA-Seq	HVO_1698
CHR	1542	-	1559198	1559375	178	as	1698				HVO_1698
CHR	1543	-	1560206	1561143	938	cd	1699			dRNA-Seq	HVO_1699
CHR	1544	+	1560229	1560331	103	as	1699				HVO_1699
CHR	1545	-	1561328	1561820	493	is	1700				HVO_1700
CHR	1546	+	1562134	1562487	354	ig	1700s				HVO_1700s
CHR	1547	-	1562155	1563208	1054	cd	1701		2		HVO_1701
CHR	1548	+	1562562	1565780	3219	cd	1703				HVO_1703
CHR	1549	+	1565822	1566941	1120	cd	1704				HVO_1704
CHR	1550	+	1567010	1567078	69	ig	1704s				HVO_1704s
CHR	1551	+	1567097	1573189	6093	cd	1705		4	dRNA-Seq	HVO_1705
CHR	1552	-	1572742	1572826	85	as	1708				HVO_1708
CHR	1553	-	1573605	1577233	3629	cd	1709		2		HVO_1709
CHR	1554	+	1574604	1574686	83	ig	1709s				HVO_1709s
CHR	1555	+	1575119	1575152	34	as	1710				HVO_1710
CHR	1556	+	1576284	1576321	38	as	1710				HVO_1710
CHR	1557	+	1577332	1581925	4594	cd	1711			dRNA-Seq	HVO_1711
CHR	1558	+	1581937	1582775	839	cd	1712			dRNA-Seq	HVO_1712
CHR	1559	+	1582895	1583348	454	as	1713				HVO_1713
CHR	1560	-	1584677	1585895	1219	cd	1714				HVO_1714
CHR	1561	-	1586622	1587331	710	cd	1716				HVO_1716
CHR	1562	-	1587496	1589545	2050	cd	1717		4		HVO_1717
CHR	1563	-	1590098	1590229	132	ig	1721s				HVO_1721s
CHR	1564	-	1590276	1592603	2328	cd	1723				HVO_1723
CHR	1565	-	1592729	1593317	589	cd	1724			dRNA-Seq	HVO_1724
CHR	1566	+	1592879	1593030	152	as	1724				HVO_1724
CHR	1567	+	1594240	1596390	2151	cd	1725	+		dRNA-Seq	HVO_1725
CHR	1568	-	1594381	1594401	21	ig	1724s				HVO_1724s
CHR	1569	-	1594441	1597669	3229	cd	1726	+	2		HVO_1726
CHR	1570	+	1597757	1599736	1980	16S	1728				HVO_1728
CHR	1571	-	1598436	1598529	94	as	1728				HVO_1728
CHR	1572	+	1599752	1603195	3444	23S	1730				HVO_1730
CHR	1573	-	1600077	1600340	264	as	1730				HVO_1730
CHR	1574	-	1600472	1600580	109	as	1730				HVO_1730
CHR	1575	-	1601644	1601720	77	as	1730				HVO_1730
CHR	1576	-	1602804	1602867	64	as	1730				HVO_1730
CHR	1577	+	1603262	1605616	2355	cd	1733	+	2	dRNA-Seq	HVO_1733
CHR	1578	-	1603676	1603808	133	as	1733				HVO_1733
CHR	1579	-	1604678	1607202	2525	cd	1735	+			HVO_1735
CHR	1580	+	1605758	1605842	85	as	1735				HVO_1735
CHR	1581	+	1606945	1607054	110	as	1735				HVO_1735
CHR	1582	+	1607344	1610352	3009	cd	1736	+	2	dRNA-Seq	HVO_1736
CHR	1583	-	1609532	1616814	7283	cd	1738	+	7		HVO_1738
CHR	1584	+	1611437	1611585	149	as	1740				HVO_1740
CHR	1585	+	1612393	1612585	193	as	1741				HVO_1741
CHR	1586	+	1615620	1615754	135	as	1744				HVO_1744
CHR	1587	+	1616412	1616576	165	as	1744				HVO_1744
CHR	1588	+	1616924	1618753	1830	cd	1745		2	dRNA-Seq	HVO_1745
CHR	1589	-	1617366	1617588	223	as	1745				HVO_1745
CHR	1590	-	1617825	1618062	238	as	1746				HVO_1746
CHR	1591	-	1618555	1618614	60	as	1746				HVO_1746
CHR	1592	+	1619605	1620986	1382	cd	1749			dRNA-Seq	HVO_1749
CHR	1593	-	1620219	1623407	3189	cd	1750		2	dRNA-Seq	HVO_1750
CHR	1594	+	1622538	1622682	145	as	1751				HVO_1751
CHR	1595	+	1623271	1623414	144	as	1751				HVO_1751
CHR	1596	-	1623416	1624140	725	cd	1752			dRNA-Seq	HVO_1752
CHR	1597	+	1624306	1625440	1135	cd	1753		3		HVO_1753
CHR	1598	+	1625626	1626594	969	cd	1757			dRNA-Seq	HVO_1757
CHR	1599	-	1625696	1625848	153	is	1756				HVO_1756
CHR	1600	+	1626724	1630150	3427	cd	1758	+	3	dRNA-Seq	HVO_1758
CHR	1601	-	1629619	1631150	1532	cd	1761	+	2	dRNA-Seq	HVO_1761
CHR	1602	+	1631533	1631650	118	is	1763				HVO_1763
CHR	1603	-	1632268	1633393	1126	cd	1764				HVO_1764
CHR	1604	+	1632307	1632421	115	as	1764				HVO_1764
CHR	1605	+	1633194	1633351	158	as	1764				HVO_1764
CHR	1606	+	1633716	1634267	552	cd	1766				HVO_1766
CHR	1607	-	1634054	1634424	371	as	1767				HVO_1767
CHR	1608	-	1634889	1634990	102	as	1767				HVO_1767
CHR	1609	+	1639872	1639926	55	is	1774				HVO_1774
CHR	1610	-	1642487	1642669	183	as	1776				HVO_1776
CHR	1611	+	1642788	1645231	2444	cd	1778	+			HVO_1778
CHR	1612	-	1644611	1644643	33	as	1778				HVO_1778
CHR	1613	-	1644693	1644927	235	as	1778				HVO_1778
CHR	1614	-	1645022	1646890	1869	cd	1779	+			HVO_1779
CHR	1615	+	1647449	1648362	914	cd	1780		2	dRNA-Seq	HVO_1780
CHR	1616	-	1647696	1647911	216	as	1780				HVO_1780
CHR	1617	-	1648616	1649649	1034	cd	1782				HVO_1782
CHR	1618	+	1649614	1650897	1284	cd	1784				HVO_1784
CHR	1619	-	1650766	1651929	1164	cd	1783		3		HVO_1783
CHR	1620	+	1652173	1654729	2557	cd	1787		3	dRNA-Seq	HVO_1787
CHR	1621	+	1654918	1656031	1114	cd	1790				HVO_1790
CHR	1622	-	1655892	1656921	1030	cd	1791			dRNA-Seq	HVO_1791
CHR	1623	+	1657136	1658119	984	cd	1792			dRNA-Seq	HVO_1792
CHR	1624	+	1658889	1658998	110	as	1793				HVO_1793
CHR	1625	-	1659917	1660041	125	cd	1793				HVO_1793
CHR	1626	-	1660164	1660314	151	ig	1795s				HVO_1795s
CHR	1627	+	1660364	1661181	818	cd	1796	+		dRNA-Seq	HVO_1796
CHR	1628	-	1660442	1660515	74	as	1796				HVO_1796
CHR	1629	-	1660689	1661759	1071	cd	1797	+			HVO_1797
CHR	1630	+	1661226	1661447	222	as	1797				HVO_1797
CHR	1631	-	1662256	1664144	1889	cd	1799		3		HVO_1799
CHR	1632	-	1664544	1665083	540	is	1802				HVO_1802
CHR	1633	-	1665442	1665968	527	RNaseP	1802_R				HVO_1802_R
CHR	1634	+	1665518	1665918	401	as	1802_R				HVO_1802_R
CHR	1635	+	1666083	1666896	814	cd	1803			dRNA-Seq	HVO_1803
CHR	1636	-	1666571	1667896	1326	cd	1804				HVO_1804
CHR	1637	+	1666982	1667131	150	as	1804				HVO_1804
CHR	1638	+	1667242	1667361	120	as	1804				HVO_1804
CHR	1639	-	1668193	1669567	1375	is	1806	+			HVO_1806
CHR	1640	+	1668202	1668373	172	as	1805				HVO_1805
CHR	1641	-	1669838	1670171	334	is	1807	+			HVO_1807
CHR	1642	-	1670336	1671651	1316	cd	1808				HVO_1808
CHR	1643	-	1671871	1671965	95	as	1809				HVO_1809
CHR	1644	+	1671926	1672672	747	cd	1809			dRNA-Seq	HVO_1809
CHR	1645	-	1672264	1672445	182	as	1809				HVO_1809
CHR	1646	-	1672460	1673036	577	cd	1810				HVO_1810
CHR	1647	+	1672875	1673041	167	as	1810				HVO_1810
CHR	1648	+	1673267	1675858	2592	cd	1811			dRNA-Seq	HVO_1811
CHR	1649	-	1675012	1675077	66	as	1811				HVO_1811
CHR	1650	+	1675967	1676485	519	is	1812				HVO_1812
CHR	1651	-	1676471	1676513	43	as	1812				HVO_1812
CHR	1652	-	1676742	1677009	268	as	1812				HVO_1812
CHR	1653	-	1677084	1677738	655	cd	1813			dRNA-Seq	HVO_1813
CHR	1654	+	1677114	1677283	170	ig	1812s				HVO_1812s
CHR	1655	+	1677306	1677773	468	as	1813				HVO_1813
CHR	1656	-	1677839	1678036	198	is	1814				HVO_1814
CHR	1657	+	1679316	1679417	102	as	1817				HVO_1817
CHR	1658	+	1679647	1680864	1218	cd	1816			dRNA-Seq	HVO_1816
CHR	1659	-	1680750	1680918	169	is	1817				HVO_1817
CHR	1660	-	1681113	1681420	308	cd	1817			dRNA-Seq	HVO_1817
CHR	1661	+	1681343	1681449	107	ig	1817s				HVO_1817s
CHR	1662	+	1681507	1682247	741	cd	1818			dRNA-Seq	HVO_1818
CHR	1663	-	1681916	1682655	740	cd	1819			dRNA-Seq	HVO_1819
CHR	1664	+	1682907	1684125	1219	cd	1820	+	2	dRNA-Seq	HVO_1820
CHR	1665	-	1683675	1684159	485	cd	1822	+		dRNA-Seq	HVO_1822
CHR	1666	+	1684281	1684394	114	as	1822				HVO_1822
CHR	1667	+	1684715	1686881	2167	cd	1824			dRNA-Seq	HVO_1824
CHR	1668	-	1686294	1687663	1370	cd	1825	+	3	dRNA-Seq	HVO_1825
CHR	1669	+	1687661	1687805	145	ig	1827s				HVO_1827s
CHR	1670	-	1687710	1689300	1591	cd	1829			dRNA-Seq	HVO_1829
CHR	1671	+	1687832	1689172	1341	cd	1828				HVO_1828
CHR	1672	+	1689393	1693350	3958	cd	1830		4	dRNA-Seq	HVO_1830
CHR	1673	-	1691693	1691866	174	as	1832				HVO_1832
CHR	1674	-	1692407	1693049	643	as	1832				HVO_1832
CHR	1675	-	1693163	1693736	574	ig	1833s1				HVO_1833s1
CHR	1676	+	1693356	1693425	70	ig	1833s2				HVO_1833s2
CHR	1677	+	1693445	1693488	44	ig	1833s3				HVO_1833s3
CHR	1678	+	1693606	1693725	120	ig	1833s4				HVO_1833s4
CHR	1679	+	1693947	1694056	110	ig	1832s3				HVO_1832s3
CHR	1680	+	1694070	1694091	22	ig	1833s5				HVO_1833s5
CHR	1681	+	1694290	1694311	22	as	1834				HVO_1834
CHR	1682	+	1694338	1694376	39	as	1834				HVO_1834
CHR	1683	-	1694346	1694447	102	cd	1834			dRNA-Seq	HVO_1834
CHR	1684	+	1694540	1696200	1661	cd	1835			dRNA-Seq	HVO_1835
CHR	1685	-	1694625	1694852	228	as	1835				HVO_1835
CHR	1686	-	1695758	1696387	630	cd	1834			dRNA-Seq	HVO_1834
CHR	1687	-	1696435	1696490	56	ig	1834s				HVO_1834s
CHR	1688	+	1696554	1696895	342	cd	1838				HVO_1838
CHR	1689	-	1697098	1697734	637	cd	1837				HVO_1837
CHR	1690	-	1697896	1698223	328	cd	1837				HVO_1837
CHR	1691	+	1698169	1699740	1572	cd	1838				HVO_1838
CHR	1692	-	1698954	1699069	116	as	1838				HVO_1838
CHR	1693	-	1699251	1699348	98	as	1838				HVO_1838
CHR	1694	-	1699672	1700416	745	is	1839				HVO_1839
CHR	1695	+	1699837	1699961	125	as	1839				HVO_1839
CHR	1696	+	1702375	1702395	21	is	1841				HVO_1841
CHR	1697	+	1703294	1705690	2397	cd	1841_A				HVO_1841_A
CHR	1698	-	1704315	1704696	382	cd	1844				HVO_1844
CHR	1699	+	1706175	1706320	146	tRNA	1846				HVO_1846
CHR	1700	+	1706339	1706365	27	ig	1846s				HVO_1846s
CHR	1701	-	1706495	1708620	2126	cd	1847		2		HVO_1847
CHR	1702	+	1707283	1707393	111	as	1847				HVO_1847
CHR	1703	+	1707452	1707581	130	as	1847				HVO_1847
CHR	1704	+	1708549	1708738	190	as	1848_A				HVO_1848_A
CHR	1705	+	1709469	1710067	599	is	1849				HVO_1849
CHR	1706	-	1709940	1710042	103	as	1849				HVO_1849
CHR	1707	-	1710048	1712452	2405	cd	1850		4	dRNA-Seq	HVO_1850
CHR	1708	+	1710768	1710917	150	as	1851				HVO_1851
CHR	1709	-	1712792	1714079	1288	cd	1854			dRNA-Seq	HVO_1854
CHR	1710	-	1714645	1717797	3153	cd	1856		4		HVO_1856
CHR	1711	+	1715949	1716060	112	as	1857				HVO_1857
CHR	1712	+	1718012	1719096	1085	cd	1861	+		dRNA-Seq	HVO_1861
CHR	1713	-	1718781	1720744	1964	cd	1862	+	2		HVO_1862
CHR	1714	+	1719610	1719787	178	as	1862				HVO_1862
CHR	1715	-	1720792	1721819	1028	cd	1864			dRNA-Seq	HVO_1864
CHR	1716	-	1722072	1722179	108	is	1865				HVO_1865
CHR	1717	+	1722301	1724999	2699	cd	1866	+	2	dRNA-Seq	HVO_1866
CHR	1718	-	1724331	1725256	926	cd	1868	+			HVO_1868
CHR	1719	+	1725353	1729873	4521	cd	1869	+	3		HVO_1869
CHR	1720	-	1725658	1725870	213	as	1869				HVO_1869
CHR	1721	-	1729434	1731364	1931	cd	1872	+	3	dRNA-Seq	HVO_1872
CHR	1722	+	1729986	1730108	123	ig	1872s				HVO_1872s
CHR	1723	+	1731399	1733526	2128	cd	1875		2	dRNA-Seq	HVO_1875
CHR	1724	-	1733136	1733684	549	tRNA	1877				HVO_1877
CHR	1725	+	1733584	1734737	1154	cd	1878			dRNA-Seq	HVO_1878
CHR	1726	-	1734245	1734539	295	as	1878				HVO_1878
CHR	1727	-	1734734	1734924	191	is	1879				HVO_1879
CHR	1728	+	1734747	1734779	33	as	1879				HVO_1879
CHR	1729	+	1734834	1734896	63	as	1879				HVO_1879
CHR	1730	+	1735471	1736414	944	cd	1880			dRNA-Seq	HVO_1880
CHR	1731	-	1735594	1735860	267	as	1880				HVO_1880
CHR	1732	-	1735981	1736142	162	as	1880				HVO_1880
CHR	1733	+	1736617	1736877	261	as	1882				HVO_1882
CHR	1734	+	1736977	1737232	256	as	1882				HVO_1882
CHR	1735	-	1736978	1737326	349	is	1882				HVO_1882
CHR	1736	-	1737469	1737526	58	ig	1882s				HVO_1882s
CHR	1737	+	1737625	1737670	46	as	1883				HVO_1883
CHR	1738	-	1737632	1738290	659	cd	1883				HVO_1883
CHR	1739	+	1738414	1739037	624	cd	1884			dRNA-Seq	HVO_1884
CHR	1740	+	1739077	1740094	1018	cd	1885	+		dRNA-Seq	HVO_1885
CHR	1741	-	1739390	1742625	3236	cd	1886	+	3		HVO_1886
CHR	1742	+	1740445	1740558	114	as	1886				HVO_1886
CHR	1743	-	1742718	1742829	112	as	1888_A				HVO_1888_A
CHR	1744	-	1743302	1750437	7136	cd	1890		13		HVO_1890
CHR	1745	+	1743373	1743522	150	as	1890				HVO_1890
CHR	1746	+	1743559	1743609	51	as	1890				HVO_1890
CHR	1747	+	1743652	1743761	110	as	1891				HVO_1891
CHR	1748	+	1743798	1744435	638	as	1892				HVO_1892
CHR	1749	+	1745041	1745124	84	as	1894				HVO_1894
CHR	1750	-	1750686	1750768	83	is	1902				HVO_1902
CHR	1751	+	1751613	1752881	1269	cd	1903			dRNA-Seq	HVO_1903
CHR	1752	-	1752567	1753761	1195	cd	1904		2		HVO_1904
CHR	1753	-	1753993	1754082	90	as	1906				HVO_1906
CHR	1754	-	1754472	1756227	1756	cd	1907			dRNA-Seq	HVO_1907
CHR	1755	-	1756246	1756325	80	ig	1907s				HVO_1907s
CHR	1756	+	1757368	1757576	209	is	1908				HVO_1908
CHR	1757	-	1758966	1759057	92	as	1909				HVO_1909
CHR	1758	-	1759299	1759342	44	as	1909				HVO_1909
CHR	1759	-	1759349	1759376	28	as	1909				HVO_1909
CHR	1760	+	1759597	1761385	1789	cd	1911		3		HVO_1911
CHR	1761	-	1759730	1759830	101	as	1911				HVO_1911
CHR	1762	+	1761747	1762964	1218	cd	1914			dRNA-Seq	HVO_1914
CHR	1763	-	1763095	1768253	5159	cd	1916		3	dRNA-Seq	HVO_1916
CHR	1764	+	1763171	1763213	43	is	1915				HVO_1915
CHR	1765	+	1763222	1763254	33	is	1915				HVO_1915
CHR	1766	+	1765417	1765525	109	as	1917				HVO_1917
CHR	1767	+	1768364	1772974	4611	cd	1919		3	dRNA-Seq	HVO_1919
CHR	1768	-	1771756	1772253	498	cd	1922			dRNA-Seq	HVO_1922
CHR	1769	-	1772340	1772360	21	ig	1922s1				HVO_1922s1
CHR	1770	-	1772394	1772477	84	ig	1922s2				HVO_1922s2
CHR	1771	-	1772605	1773001	397	as	1923				HVO_1923
CHR	1772	+	1773519	1774497	979	cd	1925				HVO_1925
CHR	1773	-	1774572	1775388	817	cd	1926			dRNA-Seq	HVO_1926
CHR	1774	-	1775429	1777547	2119	cd	1927		2	dRNA-Seq	HVO_1927
CHR	1775	-	1777682	1778227	546	cd	1929			dRNA-Seq	HVO_1929
CHR	1776	-	1778454	1778646	193	ig	1929s				HVO_1929s
CHR	1777	+	1778484	1779082	599	cd	1930_A				HVO_1930_A
CHR	1778	-	1779142	1780668	1527	cd	1932	+			HVO_1932
CHR	1779	+	1779205	1779843	639	cd	1931	+		dRNA-Seq	HVO_1931
CHR	1780	+	1779849	1779924	76	ig	1931s				HVO_1931s
CHR	1781	-	1781182	1782480	1299	cd	1934			dRNA-Seq	HVO_1934
CHR	1782	+	1781256	1781373	118	CD box	1933s				HVO_1933s
CHR	1783	+	1782914	1783035	122	is	1935				HVO_1935
CHR	1784	+	1783236	1783327	92	is	1935				HVO_1935
CHR	1785	+	1783598	1785093	1496	cd	1937				HVO_1937
CHR	1786	-	1784164	1784224	61						HVO_
CHR	1787	-	1784232	1784277	46						HVO_
CHR	1788	-	1784497	1784804	308	as	1937				HVO_1937
CHR	1789	-	1784833	1785322	490	cd	1937_A				HVO_1937_A
CHR	1790	+	1785171	1785345	175	as	1937_A				HVO_1937_A
CHR	1791	+	1785537	1785735	199	cd	1938			dRNA-Seq	HVO_1938
CHR	1792	-	1785733	1790264	4532	cd	1939		2		HVO_1939
CHR	1793	+	1790450	1791390	941	cd	1941			dRNA-Seq	HVO_1941
CHR	1794	+	1791635	1794011	2377	cd	1942		2		HVO_1942
CHR	1795	+	1794867	1797306	2440	cd	1944		2		HVO_1944
CHR	1796	+	1797350	1797734	385	cd	1946			dRNA-Seq	HVO_1946
CHR	1797	-	1797541	1799725	2185	cd	1947		4		HVO_1947
CHR	1798	-	1799911	1800447	537	cd	1951				HVO_1951
CHR	1799	+	1800514	1800562	49	as	1953				HVO_1953
CHR	1800	-	1801630	1804298	2669	cd	1953		2		HVO_1953
CHR	1801	-	1804433	1806421	1989	cd	1955				HVO_1955
CHR	1802	+	1805386	1805569	184	as	1955				HVO_1955
CHR	1803	+	1806718	1807371	654	cd	1956				HVO_1956
CHR	1804	+	1807575	1810404	2830	cd	1957		3	dRNA-Seq	HVO_1957
CHR	1805	-	1808103	1808133	31	as	1957				HVO_1957
CHR	1806	+	1810469	1811267	799	cd	1960		2	dRNA-Seq	HVO_1960
CHR	1807	-	1810860	1811532	673	cd	1962				HVO_1962
CHR	1808	+	1811416	1811764	349	as	1962				HVO_1962
CHR	1809	-	1811593	1813473	1881	cd	1963				HVO_1963
CHR	1810	-	1813644	1813679	36	as	1964				HVO_1964
CHR	1811	+	1813656	1814735	1080	cd	1964	+	2	dRNA-Seq	HVO_1964
CHR	1812	-	1814282	1815314	1033	cd	1966	+			HVO_1966
CHR	1813	+	1815152	1815330	179	ig	1966s				HVO_1966s
CHR	1814	-	1815729	1816323	595	is	1967				HVO_1967
CHR	1815	+	1816703	1817322	620	cd	1968			dRNA-Seq	HVO_1968
CHR	1816	-	1818720	1819322	603	cd	1971				HVO_1971
CHR	1817	-	1819434	1821087	1654	cd	1974			dRNA-Seq	HVO_1974
CHR	1818	+	1820213	1823806	3594	cd	1975		2	dRNA-Seq	HVO_1975
CHR	1819	-	1821455	1821477	23	as	1975				HVO_1975
CHR	1820	-	1823626	1823772	147	as	1976				HVO_1976
CHR	1821	+	1823893	1824428	536	cd	1977			dRNA-Seq	HVO_1977
CHR	1822	-	1824111	1826222	2112	cd	1978		2	dRNA-Seq	HVO_1978
CHR	1823	+	1824773	1824978	206	as	1978				HVO_1978
CHR	1824	+	1825743	1825850	108	as	1979				HVO_1979
CHR	1825	+	1826434	1827857	1424	cd	1980	+			HVO_1980
CHR	1826	-	1827507	1828225	719	cd	1981	+		dRNA-Seq	HVO_1981
CHR	1827	-	1828597	1828826	230	cd	1982			dRNA-Seq	HVO_1982
CHR	1828	-	1829066	1830186	1121	cd	1983				HVO_1983
CHR	1829	-	1830382	1831253	872	cd	1984				HVO_1984
CHR	1830	+	1832007	1833786	1780	cd	1985		2		HVO_1985
CHR	1831	+	1833888	1835892	2005	cd	1987		2		HVO_1987
CHR	1832	+	1836042	1837277	1236	cd	1989				HVO_1989
CHR	1833	-	1836431	1836576	146	as	1989				HVO_1989
CHR	1834	-	1837036	1837277	242	ig	1990s				HVO_1990s
CHR	1835	+	1837345	1838917	1573	cd	1991	+			HVO_1991
CHR	1836	-	1838119	1838869	751	cd	1992	+			HVO_1992
CHR	1837	+	1839131	1839640	510	cd	1993			dRNA-Seq	HVO_1993
CHR	1838	-	1839177	1839267	91	as	1993				HVO_1993
CHR	1839	+	1840690	1841372	683	cd	1995			dRNA-Seq	HVO_1995
CHR	1840	+	1841395	1844246	2852	cd	1996		3	dRNA-Seq	HVO_1996
CHR	1841	-	1845047	1846592	1546	cd	1999		2		HVO_1999
CHR	1842	+	1846222	1846242	21	as	1999				HVO_1999
CHR	1843	+	1846788	1849321	2534	cd	2001	+	3	dRNA-Seq	HVO_2001
CHR	1844	-	1848812	1850019	1208	cd	2004	+			HVO_2004
CHR	1845	+	1849827	1849951	125	as	2004				HVO_2004
CHR	1846	+	1850314	1852149	1836	cd	2006				HVO_2006
CHR	1847	-	1851467	1851626	160	as	2006				HVO_2006
CHR	1848	-	1852375	1852479	105	as	2006s				HVO_2006s
CHR	1849	+	1852735	1852957	223	ig	2006s				HVO_2006s
CHR	1850	-	1852763	1853673	911	cd	2007			dRNA-Seq	HVO_2007
CHR	1851	+	1852976	1853126	151	as	2007				HVO_2007
CHR	1852	+	1853839	1855716	1878	cd	2008				HVO_2008
CHR	1853	-	1855194	1855400	207	as	2008				HVO_2008
CHR	1854	-	1855534	1855741	208	ig	2008s				HVO_2008s
CHR	1855	+	1855795	1856556	762	cd	2009		2	dRNA-Seq	HVO_2009
CHR	1856	+	1856675	1857186	512	cd	2011			dRNA-Seq	HVO_2011
CHR	1857	-	1857342	1859882	2541	cd	2012			dRNA-Seq	HVO_2012
CHR	1858	+	1857691	1857731	41	as	2011s2				HVO_2011s2
CHR	1859	-	1860299	1860467	169	as	2014				HVO_2014
CHR	1860	+	1860363	1860461	99	is	2014				HVO_2014
CHR	1861	-	1860532	1865149	4618	cd	2015		5	dRNA-Seq	HVO_2015
CHR	1862	+	1860576	1860913	338	as	2015				HVO_2015
CHR	1863	+	1864831	1864972	142	as	2019				HVO_2019
CHR	1864	-	1865196	1867000	1805	cd	2020	+	2	dRNA-Seq	HVO_2020
CHR	1865	+	1865386	1866728	1343	ig	2019s				HVO_2019s
CHR	1866	+	1866834	1866921	88	as	2021				HVO_2021
CHR	1867	-	1867261	1867863	603	cd	2022			dRNA-Seq	HVO_2022
CHR	1868	+	1868285	1868641	357	ig	2023s				HVO_2023s
CHR	1869	-	1868285	1870053	1769	as	2024				HVO_2024
CHR	1870	+	1870253	1871744	1492	cd	2025	+	2	dRNA-Seq	HVO_2025
CHR	1871	-	1870554	1870663	110	as	2025				HVO_2025
CHR	1872	-	1871170	1871281	112	as	2025				HVO_2025
CHR	1873	-	1871448	1872101	654	cd	2027	+			HVO_2027
CHR	1874	+	1871819	1871919	101	as	2027				HVO_2027
CHR	1875	+	1872304	1873699	1396	cd	2030		2	dRNA-Seq	HVO_2030
CHR	1876	-	1873501	1875068	1568	cd	2029	+		dRNA-Seq	HVO_2029
CHR	1877	+	1875207	1878009	2803	cd	2031		2		HVO_2031
CHR	1878	+	1878197	1879049	853	cd	2033				HVO_2033
CHR	1879	+	1879378	1880339	962	cd	2034				HVO_2034
CHR	1880	+	1880348	1881805	1458	cd	2035		2		HVO_2035
CHR	1881	-	1881229	1881284	56	as	2035				HVO_2035
CHR	1882	-	1881302	1881459	158	as	2035				HVO_2035
CHR	1883	-	1881877	1882387	511	cd	2037				HVO_2037
CHR	1884	+	1881918	1882199	282	as	2037				HVO_2037
CHR	1885	-	1882447	1884314	1868	cd	2037_A		2		HVO_2037_A
CHR	1886	+	1883998	1884093	96	as	2036				HVO_2036
CHR	1887	+	1884470	1884545	76	ig	2038s				HVO_2038s
CHR	1888	-	1884481	1885154	674	cd	2039			dRNA-Seq	HVO_2039
CHR	1889	+	1884875	1885101	227	as	2039				HVO_2039
CHR	1890	+	1885457	1887118	1662	cd	2040		2	dRNA-Seq	HVO_2040
CHR	1891	-	1886875	1888149	1275	ig	2041s1				HVO_2041s1
CHR	1892	+	1887268	1887569	302	ig	2041s2				HVO_2041s2
CHR	1893	+	1888373	1889712	1340	cd	2042			dRNA-Seq	HVO_2042
CHR	1894	-	1889662	1889743	82	as	2042				HVO_2042
CHR	1895	-	1890741	1891970	1230	cd	2044				HVO_2044
CHR	1896	+	1891345	1891490	146	as	2044				HVO_2044
CHR	1897	+	1891587	1891657	71	as	2044				HVO_2044
CHR	1898	+	1892010	1892071	62	ig	2044s				HVO_2044s
CHR	1899	+	1892183	1892571	389	cd	2045	+		dRNA-Seq	HVO_2045
CHR	1900	-	1892199	1894016	1818	cd	2046	+		dRNA-Seq	HVO_2046
CHR	1901	+	1893834	1896874	3041	cd	2047		3		HVO_2047
CHR	1902	-	1894119	1894153	35	as	2047				HVO_2047
CHR	1903	-	1894173	1894203	31						HVO_
CHR	1904	-	1895630	1895663	34	as	2048				HVO_2048
CHR	1905	-	1897067	1897885	819	cd	2050				HVO_2050
CHR	1906	+	1897796	1901076	3281	cd	2051		3	dRNA-Seq	HVO_2051
CHR	1907	-	1897933	1898161	229	as	2051				HVO_2051
CHR	1908	-	1899065	1900596	1532	as	2052				HVO_2052
CHR	1909	-	1901117	1901338	222	as	2053				HVO_2053
CHR	1910	+	1901127	1902489	1363	cd	2053				HVO_2053
CHR	1911	-	1901493	1901643	151	as	2053				HVO_2053
CHR	1912	-	1902717	1905309	2593	cd	2054		2		HVO_2054
CHR	1913	+	1903721	1903859	139	as	2055				HVO_2055
CHR	1914	+	1904036	1904537	502	as	2055				HVO_2055
CHR	1915	+	1904934	1905084	151	as	2055				HVO_2055
CHR	1916	+	1905128	1905161	34	as	2055				HVO_2055
CHR	1917	+	1905434	1907679	2246	cd	2056	+	2		HVO_2056
CHR	1918	-	1905598	1905737	140	as	2056				HVO_2056
CHR	1919	-	1906802	1906852	51	as	2057				HVO_2057
CHR	1920	-	1906858	1908116	1259	cd	2058	+			HVO_2058
CHR	1921	+	1908190	1909952	1763	cd	2059	+	2	dRNA-Seq	HVO_2059
CHR	1922	-	1909078	1910963	1886	cd	2061	+		dRNA-Seq	HVO_2061
CHR	1923	+	1910106	1910185	80	as	2061				HVO_2061
CHR	1924	+	1910239	1910415	177	as	2061				HVO_2061
CHR	1925	+	1910559	1910706	148	as	2061				HVO_2061
CHR	1926	-	1911031	1911914	884	cd	2062			dRNA-Seq	HVO_2062
CHR	1927	+	1911339	1911558	220	as	2062				HVO_2062
CHR	1928	+	1912313	1912375	63	ig	2062s				HVO_2062s
CHR	1929	-	1912337	1913432	1096	cd	2063		2		HVO_2063
CHR	1930	+	1913560	1913979	420	cd	2065				HVO_2065
CHR	1931	-	1913798	1913863	66	as	2065				HVO_2065
CHR	1932	+	1914015	1915571	1557	cd	2066	+		dRNA-Seq	HVO_2066
CHR	1933	-	1914047	1914159	113	as	2066				HVO_2066
CHR	1934	-	1914326	1921640	7315	cd	2067	+	4		HVO_2067
CHR	1935	+	1916462	1916559	98	as	2068				HVO_2068
CHR	1936	+	1921734	1921857	124	ig	2070s				HVO_2070s
CHR	1937	+	1921896	1923815	1920	cd	2071			dRNA-Seq	HVO_2071
CHR	1938	-	1922955	1923048	94	as	2071				HVO_2071
CHR	1939	-	1923073	1923222	150	as	2071				HVO_2071
CHR	1940	-	1923503	1923761	259	ig	2071s				HVO_2071s
CHR	1941	+	1923826	1926982	3157	cd	2072	+			HVO_2072
CHR	1942	-	1924380	1924482	103	as	2072				HVO_2072
CHR	1943	-	1924764	1924851	88	as	2072				HVO_2072
CHR	1944	-	1924984	1925073	90	as	2072				HVO_2072
CHR	1945	-	1925714	1925799	86	as	2072				HVO_2072
CHR	1946	-	1925925	1926328	404	as	2072				HVO_2072
CHR	1947	-	1926629	1927530	902	cd	2073	+		dRNA-Seq	HVO_2073
CHR	1948	+	1927555	1927760	206	ig	2073s1				HVO_2073s1
CHR	1949	-	1927605	1927756	152	ig	2073s2				HVO_2073s2
CHR	1950	+	1927914	1929651	1738	cd	2074				HVO_2074
CHR	1951	-	1929347	1929388	42	as	2074				HVO_2074
CHR	1952	-	1930265	1932128	1864	cd	2075			dRNA-Seq	HVO_2075
CHR	1953	+	1930382	1930432	51	is	2076				HVO_2076
CHR	1954	+	1932181	1932225	45	ig	2075s				HVO_2075s
CHR	1955	+	1932921	1933517	597	cd	2078				HVO_2078
CHR	1956	-	1933938	1937860	3923	cd	2079		2		HVO_2079
CHR	1957	+	1935461	1935683	223	as	2079				HVO_2079
CHR	1958	+	1938063	1941208	3146	cd	2081				HVO_2081
CHR	1959	+	1941305	1944517	3213	cd	2082	+	3	dRNA-Seq	HVO_2082
CHR	1960	-	1944399	1944424	26						HVO_
CHR	1961	-	1944439	1945339	901	cd	2085	+		dRNA-Seq	HVO_2085
CHR	1962	+	1944709	1944860	152	as	2085				HVO_2085
CHR	1963	+	1945573	1947247	1675	cd	2086			dRNA-Seq	HVO_2086
CHR	1964	-	1947655	1949779	2125	cd	2087			dRNA-Seq	HVO_2087
CHR	1965	-	1950305	1952415	2111	cd	2088			dRNA-Seq	HVO_2088
CHR	1966	+	1952528	1953094	567	cd	2089				HVO_2089
CHR	1967	-	1955738	1956512	775	cd	2092			dRNA-Seq	HVO_2092
CHR	1968	-	1957804	1957883	80	as	2093				HVO_2093
CHR	1969	-	1957989	1959635	1647	cd	2094			dRNA-Seq	HVO_2094
CHR	1970	-	1959756	1960762	1007	cd	2095				HVO_2095
CHR	1971	+	1961691	1961845	155	is	2097				HVO_2097
CHR	1972	+	1963016	1963189	174	cd	2098			dRNA-Seq	HVO_2098
CHR	1973	-	1964715	1965065	351	cd	2101			dRNA-Seq	HVO_2101
CHR	1974	-	1965234	1965748	515	cd	2102				HVO_2102
CHR	1975	-	1965854	1967412	1559	cd	2103				HVO_2103
CHR	1976	-	1967455	1967783	329	cd	2104			dRNA-Seq	HVO_2104
CHR	1977	-	1969323	1969767	445	cd	2107			dRNA-Seq	HVO_2107
CHR	1978	+	1970042	1970765	724	cd	2108			dRNA-Seq	HVO_2108
CHR	1979	+	1971400	1971962	563	cd	2109			dRNA-Seq	HVO_2109
CHR	1980	+	1973324	1974080	757	cd	2110			dRNA-Seq	HVO_2110
CHR	1981	-	1974109	1975141	1033	cd	2111				HVO_2111
CHR	1982	+	1976600	1977025	426	cd	2113			dRNA-Seq	HVO_2113
CHR	1983	-	1979221	1980031	811	cd	2115			dRNA-Seq	HVO_2115
CHR	1984	+	1980215	1982097	1883	cd	2116		2	dRNA-Seq	HVO_2116
CHR	1985	+	1982190	1984098	1909	cd	2118		2		HVO_2118
CHR	1986	+	1984215	1985378	1164	cd	2120				HVO_2120
CHR	1987	-	1985786	1992098	6313	cd	2121		6		HVO_2121
CHR	1988	+	1985849	1985968	120	as	2121				HVO_2121
CHR	1989	+	1992257	1993529	1273	cd	2127			dRNA-Seq	HVO_2127
CHR	1990	+	1994509	1994595	87	is	2128				HVO_2128
CHR	1991	+	1995524	1996513	990	cd	2130			dRNA-Seq	HVO_2130
CHR	1992	-	1996838	1997916	1079	cd	2131			dRNA-Seq	HVO_2131
CHR	1993	+	1997495	1997579	85	as	2131				HVO_2131
CHR	1994	-	1998000	1998407	408	cd	2132				HVO_2132
CHR	1995	-	1998455	1999636	1182	cd	2133			dRNA-Seq	HVO_2133
CHR	1996	+	1998493	1998590	98	as	2133				HVO_2133
[truncated: 1,685 more rows]
